# Supplementary material for: Supramolecular patterns in the crystal structures of 1,3,5-trisubstituted 2,4,6-triethylbenzenes bearing halogenophenoxy groups
Source: Royal Society of Chemistry journal article supplement (doi:10.1039/d2ce01203k), 2022-11-17
Supplement: d2ce01203k1.pdf [file d2ce01203k1.pdf]

## Supporting Information

### Supramolecular patterns in the crystal structures of 1,3,5-trisubstituted 2,4,6-triethylbenzenes bearing halogenophenoxy groups

Ben Ebersbach, Wilhelm Seichter, Anke Schwarzer, Monika Mazik\*

Institut für Organische Chemie, Technische Universität Bergakademie Freiberg, Leipziger Str. 29,  
09599 Freiberg, Germany

**1.** Crystallographic data (Tables S1 – S3)

Crystallographic and structure refinement data of the studied compounds. (Table S1).

Geometrical parameters of hydrogen bonds and other interactions in the examined crystal structures (Table S2).

Geometric molecular parameters in the examined crystal structures (Table S3).

**2.** Overlay plots (Figure S1 and S2)

**3.** 2D fingerprint plots for overall and individual interactions in crystal packing of **1 – 7** (Figures S3-S10)

**4.** <sup>1</sup>H and <sup>13</sup>C NMR spectra of compounds **1 – 7** (Figures S11-S24)

## 1. Crystallographic data (Tables S1 – S3)

**Table S1.** Crystallographic and structure refinement data of the compounds studied.

| Compound                                          | <b>1</b>                                                       | <b>2a</b>                                                                                        | <b>3</b>                                                      | <b>4a</b>                                                                                       | <b>5a</b>                                                                                        | <b>6</b>                                                       | <b>7</b>                                                       |
|---------------------------------------------------|----------------------------------------------------------------|--------------------------------------------------------------------------------------------------|---------------------------------------------------------------|-------------------------------------------------------------------------------------------------|--------------------------------------------------------------------------------------------------|----------------------------------------------------------------|----------------------------------------------------------------|
| Empirical formula                                 | C <sub>33</sub> H <sub>33</sub> Br <sub>3</sub> O <sub>3</sub> | C <sub>33</sub> H <sub>33</sub> Br <sub>3</sub> O <sub>3</sub> ·C <sub>4</sub> H <sub>10</sub> O | C <sub>33</sub> H <sub>33</sub> I <sub>3</sub> O <sub>3</sub> | C <sub>33</sub> H <sub>33</sub> I <sub>3</sub> O <sub>3</sub> ·C <sub>6</sub> H <sub>14</sub> O | C <sub>33</sub> H <sub>30</sub> Br <sub>6</sub> O <sub>3</sub> ·C <sub>4</sub> H <sub>10</sub> O | C <sub>33</sub> H <sub>27</sub> Br <sub>9</sub> O <sub>3</sub> | C <sub>33</sub> H <sub>27</sub> Br <sub>9</sub> O <sub>3</sub> |
| Formula weight                                    | 717.32                                                         | 791.44                                                                                           | 858.29                                                        | 960.46                                                                                          | 1028.15                                                                                          | 1190.73                                                        | 1190.73                                                        |
| Crystal system                                    | Triclinic                                                      | Triclinic                                                                                        | Triclinic                                                     | Triclinic                                                                                       | Monoclinic                                                                                       | Monoclinic                                                     | Monoclinic                                                     |
| Space group                                       | <i>P</i> -1                                                    | <i>P</i> -1                                                                                      | <i>P</i> -1                                                   | <i>P</i> -1                                                                                     | <i>P</i> 2 <sub>1</sub> / <i>n</i>                                                               | <i>C</i> 2/ <i>c</i>                                           | <i>P</i> 2 <sub>1</sub> / <i>c</i>                             |
| <i>a</i> (Å)                                      | 9.2418(13)                                                     | 9.543(3)                                                                                         | 9.1331(5)                                                     | 16.379(5)                                                                                       | 14.5959(15)                                                                                      | 26.4658(18)                                                    | 17.7349(11)                                                    |
| <i>b</i> (Å)                                      | 11.9961(14)                                                    | 13.487(4)                                                                                        | 12.2577(6)                                                    | 16.507(3)                                                                                       | 13.3943(12)                                                                                      | 10.9463(5)                                                     | 23.194(3)                                                      |
| <i>c</i> (Å)                                      | 14.3650(19)                                                    | 14.872(3)                                                                                        | 14.8298(7)                                                    | 16.949(4)                                                                                       | 19.924(3)                                                                                        | 27.261(2)                                                      | 8.796(4)                                                       |
| α (°)                                             | 87.506(10)                                                     | 112.213(19)                                                                                      | 87.379(4)                                                     | 72.005(17)                                                                                      | 90.0                                                                                             | 90.0                                                           | 90.0                                                           |
| β (°)                                             | 79.734(11)                                                     | 93.826(19)                                                                                       | 80.456(4)                                                     | 70.41(2)                                                                                        | 100.189(9)                                                                                       | 100.532(6)                                                     | 97.162(14)                                                     |
| γ (°)                                             | 75.312(10)                                                     | 90.32(2)                                                                                         | 74.276(4)                                                     | 66.18(2)                                                                                        | 90.0                                                                                             | 90.0                                                           | 90.0                                                           |
| <i>V</i> (Å <sup>3</sup> )                        | 1515.9(4)                                                      | 1767.1(8)                                                                                        | 1575.96(14)                                                   | 3868.7(18)                                                                                      | 3833.8(7)                                                                                        | 7764.6(9)                                                      | 3589.9(16)                                                     |
| <i>Z</i>                                          | 2                                                              | 2                                                                                                | 2                                                             | 4                                                                                               | 4                                                                                                | 8                                                              | 4                                                              |
| <i>F</i> (000)                                    | 720                                                            | 804                                                                                              | 828                                                           | 1888                                                                                            | 2016                                                                                             | 4512                                                           | 2256                                                           |
| <i>D</i> <sub>c</sub> (Mg m <sup>-3</sup> )       | 1.572                                                          | 1.487                                                                                            | 1.809                                                         | 1.649                                                                                           | 1.781                                                                                            | 2.037                                                          | 2.203                                                          |
| μ (mm <sup>-1</sup> )                             | 4.024                                                          | 3.461                                                                                            | 3.006                                                         | 2.461                                                                                           | 6.321                                                                                            | 9.324                                                          | 10.083                                                         |
| Data collection                                   |                                                                |                                                                                                  |                                                               |                                                                                                 |                                                                                                  |                                                                |                                                                |
| Temperature (K)                                   | 203(2)                                                         | 153(2)                                                                                           | 153(2)                                                        | 153(2)                                                                                          | 123(2)                                                                                           | 153(2)                                                         | 123(2)                                                         |
| No. of collected reflections                      | 19493                                                          | 33718                                                                                            | 13070                                                         | 29109                                                                                           | 44493                                                                                            | 29182                                                          | 37376                                                          |
| within the θ-limit (°)                            | 1.8 - 26.0                                                     | 1.5 - 26.0                                                                                       | 1.7 - 26.0                                                    | 1.4 - 25.3                                                                                      | 2.6 - 26.5                                                                                       | 2.6 - 25.5                                                     | 2.6 - 26.5                                                     |
| Index ranges ± <i>h</i> , ± <i>k</i> , ± <i>l</i> | -11/11,<br>-14/14,<br>-17/16                                   | -11/11,<br>-15/16,<br>-18/18                                                                     | -11/11,<br>-15/15,<br>-18/17                                  | -19/19,<br>-19/19,<br>-20/19                                                                    | -18/18,<br>-16/16,<br>-25/24                                                                     | -32/32,<br>-13/11,<br>-33/33                                   | -22/22,<br>-29/29,<br>-11/10                                   |
| No. of unique reflections                         | 5965                                                           | 6955                                                                                             | 6182                                                          | 13974                                                                                           | 7939                                                                                             | 7232                                                           | 7421                                                           |
| <i>R</i> <sub>int</sub>                           | 0.0703                                                         | 0.0712                                                                                           | 0.0636                                                        | 0.0504                                                                                          | 0.0427                                                                                           | 0.0291                                                         | 0.0680                                                         |
| Refinement                                        |                                                                |                                                                                                  |                                                               |                                                                                                 |                                                                                                  |                                                                |                                                                |

calculations:

full-matrix least-  
squares

on all  $F^2$  values

No. of refined  
parameters

|     |     |     |     |     |     |     |
|-----|-----|-----|-----|-----|-----|-----|
| 365 | 402 | 366 | 907 | 429 | 409 | 409 |
|-----|-----|-----|-----|-----|-----|-----|

No. of F values used  
[ $I > 2\sigma(I)$ ]

|      |      |      |       |      |      |      |
|------|------|------|-------|------|------|------|
| 4236 | 5310 | 4425 | 10240 | 6572 | 5836 | 5605 |
|------|------|------|-------|------|------|------|

Final  $R$ -Indices

$R(=\sum |\Delta F| / \sum |F_o|)$

|        |        |        |        |        |        |        |
|--------|--------|--------|--------|--------|--------|--------|
| 0.0489 | 0.0475 | 0.0457 | 0.0444 | 0.0359 | 0.0440 | 0.0309 |
|--------|--------|--------|--------|--------|--------|--------|

$wR$  on  $F^2$

|        |        |        |        |        |        |        |
|--------|--------|--------|--------|--------|--------|--------|
| 0.1044 | 0.1158 | 0.1087 | 0.1033 | 0.0910 | 0.1149 | 0.0621 |
|--------|--------|--------|--------|--------|--------|--------|

$S$  (=Goodness of fit on  
 $F^2$ )

|       |       |       |       |       |       |       |
|-------|-------|-------|-------|-------|-------|-------|
| 1.087 | 1.069 | 1.027 | 1.028 | 1.057 | 1.044 | 1.009 |
|-------|-------|-------|-------|-------|-------|-------|

Final  $\Delta\rho_{\max}/\Delta\rho_{\min}$  (e  $\text{\AA}^{-3}$ )

|            |            |            |            |            |            |            |
|------------|------------|------------|------------|------------|------------|------------|
| 0.36/-0.65 | 0.72/-0.80 | 0.75/-0.97 | 0.90/-0.87 | 1.05/-0.70 | 1.39/-1.06 | 0.59/-0.52 |
|------------|------------|------------|------------|------------|------------|------------|

**Table S2.** Geometrical parameters of hydrogen bonds and other interactions in the crystal structures examined.

| Atoms                       | Symmetry      | Distance                 |                                   | Angle                                     | Figure             |
|-----------------------------|---------------|--------------------------|-----------------------------------|-------------------------------------------|--------------------|
|                             |               | D...A<br>C...X<br>C...Cg | H...A<br>X...X<br>X...Cg<br>X...O | D-H...A<br>C-X...X<br>C-X...Cg<br>C-X...O |                    |
| <b>1</b>                    |               |                          |                                   |                                           |                    |
| C25-H25B...O2               | 1-x, 1-y, 1-z | 3.512(6)                 | 2.69                              | 142                                       |                    |
| C27-H27...O2                | 1-x, 1-y, 1-z | 3.606(5)                 | 2.68                              | 169                                       |                    |
| C32-H32B...O2               | 1-x, 1-y, 1-z | 3.673(5)                 | 2.69                              | 176                                       |                    |
| C24-H24C...O3               | x, y, z       | 3.218(6)                 | 2.59                              | 123                                       |                    |
| C9-H9...CgD <sup>a</sup>    | 1-x, 1-y, 1-z | 3.870(5)                 | 2.94                              | 170                                       | <b>a</b> (Fig. 6b) |
| C25-H25A...CgA <sup>a</sup> | 1-x, 1-y, 1-z | 3.475(5)                 | 2.73                              | 133                                       | <b>b</b> (Fig 6b)  |
| C33-H33C...CgA <sup>a</sup> | -x, 1-y, 1-z  | 3.516(6)                 | 2.93                              | 120                                       |                    |
| C10-Br1...Br3               | x, 1+y, -1+z  | 5.558(1)                 | 3.753(1)                          | 158.9(1)                                  | <b>c</b> (Fig. 6a) |
| C28-Br3...Br1               | x, -1+y, 1+z  | 4.444(1)                 | 3.753(1)                          | 98.1(2)                                   | <b>c</b> (Fig. 6a) |
| C19-Br2A...CgB <sup>a</sup> | 1-x, 1-y, -z  | 5.413(5)                 | 3.850(3)                          | 137.6(2)                                  |                    |
| C19-Br2B...CgB <sup>a</sup> | 1-x, 1-y, -z  | 5.413(5)                 | 3.677(13)                         | 162.2(6)                                  |                    |
| <b>2a</b>                   |               |                          |                                   |                                           |                    |
| C25-H25B...O2               | 1-x, 1-y, 1-z | 3.454(5)                 | 2.62                              | 143                                       |                    |
| C27-H27...O2                | 1-x, 1-y, 1-z | 3.551(6)                 | 2.62                              | 167                                       |                    |
| C32-H32B...O2               | 1-x, 1-y, 1-z | 3.602(6)                 | 2.61                              | 176                                       |                    |
| C14-H14B...O1               | x, y, z       | 3.325(5)                 | 2.64                              | 126                                       | <b>a</b> (Fig. 2b) |
| C14-H14A...O2               | x, y, z       | 3.257(5)                 | 2.57                              | 127                                       | <b>b</b> (Fig. 2b) |
| C21-H21...O1A               | x, y, 1+z     | 3.504(6)                 | 2.63                              | 154                                       | <b>e</b> (Fig. 7a) |
| C24-H24C...O1               | 1-x, 1-y, 1-z | 3.475(6)                 | 2.58                              | 152                                       | <b>d</b> (Fig. 7a) |
| C33-H33A...O3               | x, y, z       | 3.211(5)                 | 2.53                              | 127                                       | <b>c</b> (Fig. 2b) |
| C12-H12...CgA <sup>a</sup>  | 1+x, y, z     | 3.577(5)                 | 2.64                              | 167                                       |                    |
| C22-H22...CgD <sup>a</sup>  | 1-x, 1-y, 1-z | 3.707(5)                 | 2.92                              | 141                                       |                    |
| C11-Br1...Br2               | 2-x, -y, 1-z  | 5.407(5)                 | 3.522(1)                          | 170.1(1)                                  | <b>f</b> (Fig. 7a) |
| C20-Br2...Br1               | 2-x, -y, 1-z  | 4.122(5)                 | 3.522(1)                          | 94.1(1)                                   | <b>f</b> (Fig. 7a) |
| C20-Br2...Br2               | 1-x, -y, 2-z  | 5.396(5)                 | 3.734(1)                          | 144.4(1)                                  |                    |
| C29-Br3...CgB <sup>a</sup>  | -1+x, 1+y, z  | 5.426(6)                 | 3.572(2)                          | 163.6(2)                                  | <b>g</b> (Fig. 7a) |
| <b>3</b>                    |               |                          |                                   |                                           |                    |
| C25-H25B...O2               | 1-x, 1-y, 1-z | 3.454(7)                 | 2.61                              | 143                                       | <b>a</b> (Fig. 9b) |
| C27-H27...O2                | 1-x, 1-y, 1-z | 3.550(8)                 | 2.62                              | 167                                       | <b>b</b> (Fig. 9b) |
| C32-H32B...O2               | 1-x, 1-y, 1-z | 3.601(8)                 | 2.61                              | 176                                       | <b>c</b> (Fig. 9b) |
| C25-H25A...CgA <sup>a</sup> | 1-x, 1-y, 1-z | 3.465(8)                 | 2.72                              | 133                                       |                    |
| C33-H33A...CgA <sup>a</sup> | -x, 1-y, 1-z  | 3.475(8)                 | 2.89                              | 119                                       |                    |
| C10-I1...I2                 | 1-x, 1-y, -z  | 3.713(2)                 | 3.844(2)                          | 70.3(1)                                   | <b>d</b> (Fig. 9a) |
| C19-I2...I1                 | 1-x, 1-y, -z  | 5.824(2)                 | 3.844(2)                          | 172.6(1)                                  | <b>d</b> (Fig. 9a) |
| C10-I1...I3                 | x, 1+y, -1+z  | 6.071(2)                 | 4.081(2)                          | 156.8(1)                                  | <b>e</b> (Fig. 9a) |
| C28-I3...I1                 | x, -1+y, 1+z  | 4.721(2)                 | 4.081(2)                          | 94.0(1)                                   | <b>e</b> (Fig. 9a) |
| <b>4a</b>                   |               |                          |                                   |                                           |                    |
| C25A-H25C...O2              | x, y, z       | 3.556(7)                 | 2.70                              | 151                                       |                    |
| C31A-H31B...O2              | x, y, z       | 3.496(7)                 | 2.63                              | 150                                       |                    |
| C12-H12...O4E               | 1+x, -1+y, z  | 3.487(18)                | 2.57                              | 163                                       |                    |
| C14-H14B...O1               | x, y, z       | 3.265(7)                 | 2.58                              | 126                                       |                    |

|                               |                      |           |          |          |                       |
|-------------------------------|----------------------|-----------|----------|----------|-----------------------|
| C19A-H19A...O4C               | -x, 1-y, 1-z         | 3.468(7)  | 2.61     | 150      |                       |
| C24-H24A...O3                 | x, y, z              | 3.182(7)  | 2.49     | 128      |                       |
| C33A-H33E...O3A               | x, y, z              | 3.151(8)  | 2.46     | 127      |                       |
| C10A-H10A...CgA <sup>a</sup>  | 1-x, 1-y, -z         | 3.629(7)  | 2.71     | 163      |                       |
| C15-H15C...CgB <sup>a</sup>   | 1-x, -y, -z          | 3.481(9)  | 2.93     | 117      |                       |
| C25-H25A...CgA' <sup>a</sup>  | x, y, z              | 3.640(7)  | 2.83     | 140      |                       |
| C25A-H25D...CgA <sup>a</sup>  | x, y, z              | 3.539(7)  | 2.84     | 128      |                       |
| C36E-H36H...CgB' <sup>a</sup> | 1-x, 1-y, -z         | 3.430(18) | 2.75     | 127      |                       |
| C29-I3...CgC <sup>a</sup>     | x, 1+y, z            | 5.663(7)  | 3.625(3) | 162.6(2) | <b>a</b> (Fig. 11)    |
| C29A-I3A...CgB' <sup>a</sup>  | x, -1+y, z           | 5.566(7)  | 3.646(3) | 149.6(2) | <b>b</b> (Fig. 11)    |
| C29C-I3C...CgB' <sup>a</sup>  | x, -1+y, z           | 5.566(7)  | 3.505(3) | 170.9(2) |                       |
| C11-I1...I1A                  | x, -1+y, z           | 4.258(7)  | 3.771(1) | 88.1(2)  | <b>c</b> (Fig. 11)    |
| C11A-I1A...I1                 | x, 1+y, z            | 5.850(7)  | 3.771(1) | 169.7(2) | <b>c</b> (Fig. 11)    |
| C20-I2...I2A                  | x, -1+y, z           | 5.882(7)  | 3.803(1) | 168.0(2) | <b>d</b> (Fig. 11)    |
| C20A-I2A...I2                 | x, 1+y, z            | 4.312(7)  | 3.803(1) | 88.8(2)  | <b>d</b> (Fig. 11)    |
| <b>5a</b>                     |                      |           |          |          |                       |
| C7-H7B...Br2                  | 1.5-x, -0.5+y, 1.5-z | 3.777(4)  | 3.06     | 130      |                       |
| C14-H14A...O2                 | x, y, z              | 3.344(5)  | 2.66     | 126      | <b>a</b> (Fig. 3a)    |
| C14-H14B...O1                 | x, y, z              | 3.330(4)  | 2.66     | 125      | <b>b</b> (Fig. 3a)    |
| C16-H16A...Br1                | x, 1+y, z            | 3.970(4)  | 3.08     | 150      |                       |
| C18-H18...Br1                 | x, 1+y, z            | 3.800(4)  | 3.08     | 134      |                       |
| C24-H24B...Br2                | x, -1+y, z           | 3.954(4)  | 3.00     | 166      |                       |
| C24-H24C...O3                 | x, y, z              | 3.147(5)  | 2.43     | 129      | <b>c</b> (Fig. 3a)    |
| C11-Br2...Br6                 | 1+x, -1+y, z         | 4.427(4)  | 3.443(1) | 108.5(1) | <b>d</b> (Fig. 12)    |
| C29-Br6...Br2                 | -1+x, 1+y, z         | 5.303(4)  | 3.443(1) | 166.1(1) | <b>d</b> (Fig. 12)    |
| C28-Br5...Br5                 | -x, 1-y, 1-z         | 5.240(4)  | 3.476(1) | 153.2(1) | <b>e</b> (Fig. 12)    |
| C9-H9...CgD                   | 1-x, 1-y, 1-z        | 3.811(4)  | 2.96     | 149      |                       |
| C25-H25A...CgA                | 1-x, 1-y, 1-z        | 3.448(4)  | 2.76     | 127      |                       |
| C4A-H4AC...CgB                | 1-x, 1-y, 1-z        | 3.759(5)  | 2.82     | 162      |                       |
| <b>6</b>                      |                      |           |          |          |                       |
| C18-H18...C26 <sup>b</sup>    | 0.5-x, 1.5-y, 1-z    | 3.616(6)  | 2.81     | 143      |                       |
| C32-H32B...O2                 | 0.5-x, 1.5-y, 1-z    | 3.528(6)  | 2.57     | 162      | <b>b</b> (Fig. 13a,b) |
| C33-H33C...O3                 | x, y, z              | 3.242(7)  | 2.54     | 129      | <b>a</b> (Fig. 3b)    |
| C25-H25B...CgA <sup>a</sup>   | 0.5-x, 1.5-y, 1-z    | 3.382(5)  | 2.71     | 126      | <b>h</b> (Fig. 13b)   |
| C19-Br4...Br9                 | 0.5-x, 1.5-y, 1-z    | 5.075(1)  | 3.683(1) | 127.5(1) | <b>c</b> (Fig. 13a,b) |
| C30-Br9...Br4                 | 0.5-x, 1.5-y, 1-z    | 3.710(1)  | 3.683(1) | 76.1(1)  | <b>c</b> (Fig. 13a,b) |
| C19-Br4...Br9                 | x, 2-y, -0.5+z       | 3.609(1)  | 3.542(1) | 76.5(1)  | <b>d</b> (Fig. 13a)   |
| C30-Br9...Br4                 | x, 2-y, 0.5+z        | 5.180(1)  | 3.542(1) | 143.5(1) | <b>d</b> (Fig. 13a)   |
| C28-Br7...Br7                 | -x, 2-y, 1-z         | 5.247(1)  | 3.511(1) | 150.7(1) | <b>e</b> (Fig. 13a)   |
| C10-Br1...CgC <sup>a</sup>    | 1-x, 1-y, 1-z        | 5.053(6)  | 3.417(2) | 142.6(1) | <b>f</b> (Fig. 13a)   |
| C12-Br3...CgA <sup>a</sup>    | x, -1+y, z           | 5.331(6)  | 3.466(2) | 170.3(1) |                       |
| C20-Br5...C13 <sup>b</sup>    | x, 1-y, -0.5+z       | 5.180(6)  | 3.392(2) | 156.4(2) | <b>g</b> (Fig. 13a)   |
| <b>7</b>                      |                      |           |          |          |                       |
| C23-H23A...O2                 | x, y, z              | 3.079(5)  | 2.35     | 130      | <b>a</b> (Fig. 3c)    |
| C23-H23B...O3                 | x, y, z              | 3.185(5)  | 2.45     | 131      | <b>b</b> (Fig. 3c)    |
| C28-H28...Br2                 | -x, -0.5+y, 0.5-z    | 3.729(4)  | 2.89     | 148      |                       |
| C32-H32B...Br1                | x, y, z              | 3.755(4)  | 2.89     | 146      | <b>c</b> (Fig. 3c)    |
| C32-H32B...O1                 | x, y, z              | 3.162(4)  | 2.43     | 130      | <b>d</b> (Fig. 3c)    |
| C13-Br3...Br4                 | x, y, z              | 5.228(4)  | 3.621(2) | 141.0(1) | <b>e</b> (Fig. 3c)    |
| C18-Br4...Br3                 | x, y, z              | 5.210(4)  | 3.621(2) | 139.5(1) | <b>e</b> (Fig. 3c)    |
| C20-Br5...Br8                 | 1+x, y, z            | 5.639(4)  | 3.784(2) | 164.2(1) | <b>i</b> (Fig. 14a)   |
| C29-Br8...Br5                 | -1+x, y, z           | 4.547(4)  | 3.784(2) | 101.0(1) | <b>i</b> (Fig. 14a)   |
| C29-Br8...Br9                 | -x, 1-y, -z          | 5.097(4)  | 3.737(2) | 126.3(1) | <b>g</b> (Fig. 14a,b) |

|               |             |          |          |          |                       |
|---------------|-------------|----------|----------|----------|-----------------------|
| C31-Br9...Br8 | -x, 1-y, -z | 3.897(4) | 3.737(2) | 80.4(1)  | <b>g</b> (Fig. 14a,b) |
| C29-Br8...O1  | -x, 1-y, -z | 5.069(4) | 3.266(2) | 157.1(1) | <b>h</b> (Fig. 14a,b) |

<sup>a</sup> Cg means the centroid (centre of gravity) of the aromatic ring. <sup>b</sup> An individual ring atom instead the ring centre was chosen as a acceptor position. **1, 2a, 3, 4a, 5a, 7**: Ring A: C1-C6; ring B: C8-C13; ring C: C17-C22; ring D: C26-C31. **6**: Ring A: C1-C6; ring B: C8-C13; ring C: C17-C22; ring A': C1A-C6A; ring B': C8A-C13A.

**Table S3.** Geometric molecular parameters in the crystal structures examined.

| Compound                        | <b>1</b>      | <b>2a</b>     | <b>3</b>      | <b>4a-1</b>   | <b>4a-2</b>   | <b>5a</b>     | <b>6</b>      | <b>7</b>      |
|---------------------------------|---------------|---------------|---------------|---------------|---------------|---------------|---------------|---------------|
| Dihedral angle (°) <sup>a</sup> |               |               |               |               |               |               |               |               |
| mpla(A)-mpla(B)                 | 56.5(2)       | 88.1(1)       | 56.1(2)       | 78.4(1)       | 89.4(2)       | 79.1(1)       | 89.3(2)       | 33.0(1)       |
| mpla(A)-mpla(C)                 | 83.5(1)       | 72.0(1)       | 81.5(5)       | 86.2(2)       | 82.5(2)       | 82.3(1)       | 84.0(1)       | 44.2(1)       |
| mpla(A)-mpla(D)                 | 52.4(1)       | 59.0(1)       | 53.3(2)       | 63.7(2)       | 58.3(2)       | 62.5(1)       | 64.6(1)       | 57.2(1)       |
| mpla(B)-mpla(C)                 | 68.2(1)       | 73.5(1)       | 66.7(6)       | 65.1(2)       | 70.8(2)       | 65.3(1)       | 79.1(2)       | 21.3(1)       |
| mpla(B)-mpla(D)                 | 83.6(1)       | 66.0(1)       | 85.8(2)       | 57.1(2)       | 61.7(2)       | 77.6(1)       | 46.0(2)       | 52.2(1)       |
| mpla(C)-mpla(D)                 | 66.0(1)       | 64.6(1)       | 61.1(7)       | 71.0(2)       | 64.5(2)       | 46.2(1)       | 67.7(2)       | 33.3(1)       |
| Torsion angle (°)               |               |               |               |               |               |               |               |               |
| C1-C7-O1-C8                     | 169.4(4)      | 174.2(3)      | 169.2(5)      | 176.1(4)      | 174.6(5)      | -<br>178.5(3) | 175.2(4)      | -<br>168.3(3) |
| C7-O1-C8-C9                     | -<br>143.7(4) | 1.8(6)        | -<br>143.3(6) | 5.4(8)        | 179.4(5)      | -<br>172.2(3) | -2.9(7)       | -82.8(5)      |
| C3-C16-O2-C17                   | -<br>178.3(3) | -<br>170.3(3) | -<br>173.9(7) | -<br>175.9(4) | -<br>173.5(5) | -<br>168.7(3) | -<br>166.2(4) | 136.5(3)      |
| C16-O2-C17-C18                  | -3.5(6)       | -13.9(6)      | -8.4(13)      | -6.4(8)       | 167.6(5)      | -6.8(5)       | 168.8(5)      | -98.3(4)      |
| C5-C25-O3-C26                   | 175.0(3)      | -<br>173.4(3) | 177.9(5)      | 169.2(5)      | -<br>178.2(5) | -<br>176.6(3) | 167.8(4)      | -99.0(4)      |
| C25-O3-C26-C27                  | 17.3(6)       | -17.1(6)      | 16.3(9)       | -<br>167.3(5) | 167.6(6)      | 6.7(5)        | -2.0(7)       | -79.9(4)      |

<sup>a</sup> mpla means the least-squares-plane through the aromatic ring. **1, 2a, 3, 4a, 5a, 7**: Ring A: C1-C6; ring B: C8-C13; ring C: C17-C22; ring D: C26-C31. **6**: Ring A: C1-C6; ring B: C8-C13; ring C: C17-C22; ring D: C26-C31; ring A': C1A-C6A; ring B': C8A-C13A; ring C': C17A-C22A; ring D': C26A-C31A.

## 2. Overlay plots (Figures S1 and S2)

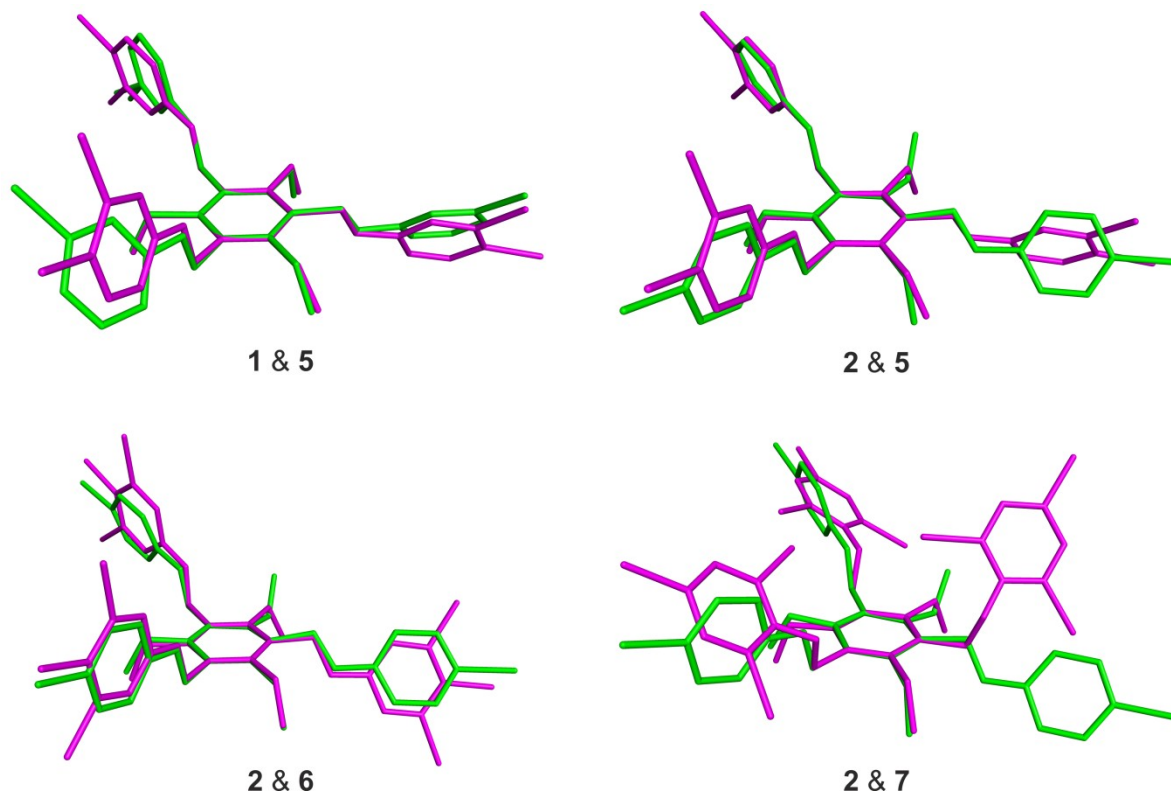

**Figure S1.** Views of the superpositions of **1** (green) & **5** (purple), **2** (green) & **5** (purple), **2** (green) & **6** (purple) as well as **2** (green) & **7** (purple) fitted on the atoms C1, C3 and C5 of the molecules (H atoms are omitted for clarity).

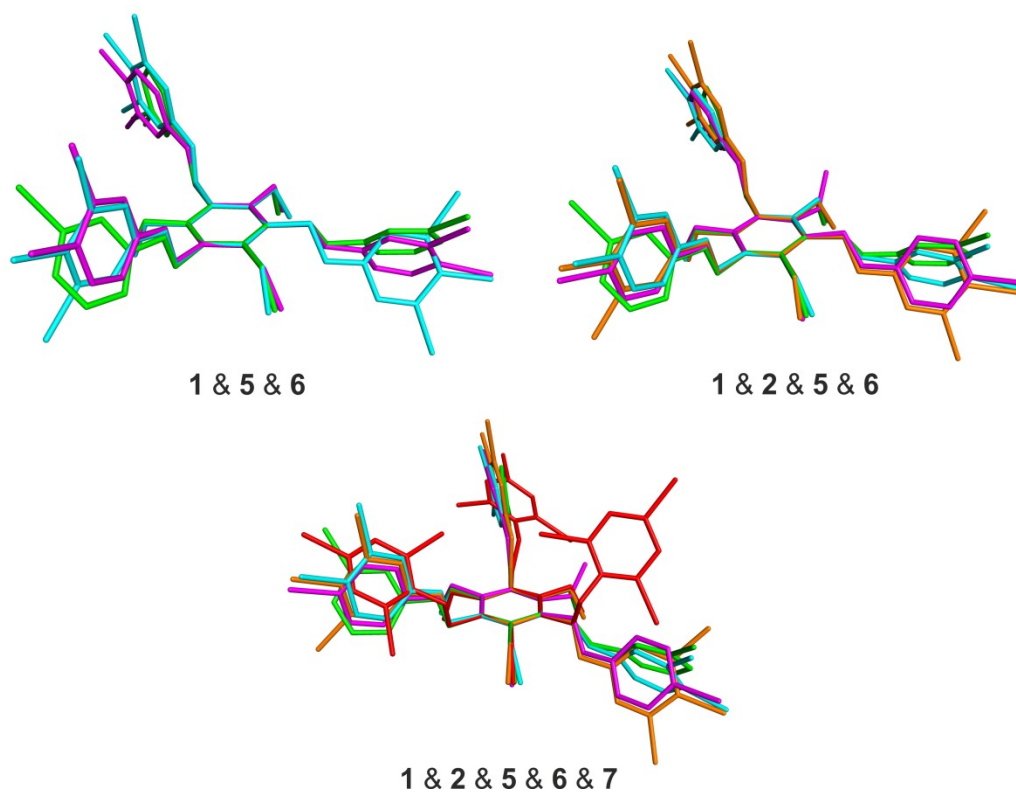

**Figure S2.** Views of the superpositions of **1** (green) & **5** (purple) & **6** (cyan), **1** (green) & **2** (purple) & **5** (cyan) & **6** (orange) as well as **1** (green) & **2** (purple) & **5** (cyan) & **6** (orange) & **7** (red) fitted on the atoms C1, C3 and C5 of the molecules (H atoms are omitted for clarity).



3. 2D fingerprint plots for overall and individual interactions in crystal packing of 1 – 7 (Figures S3-S10)

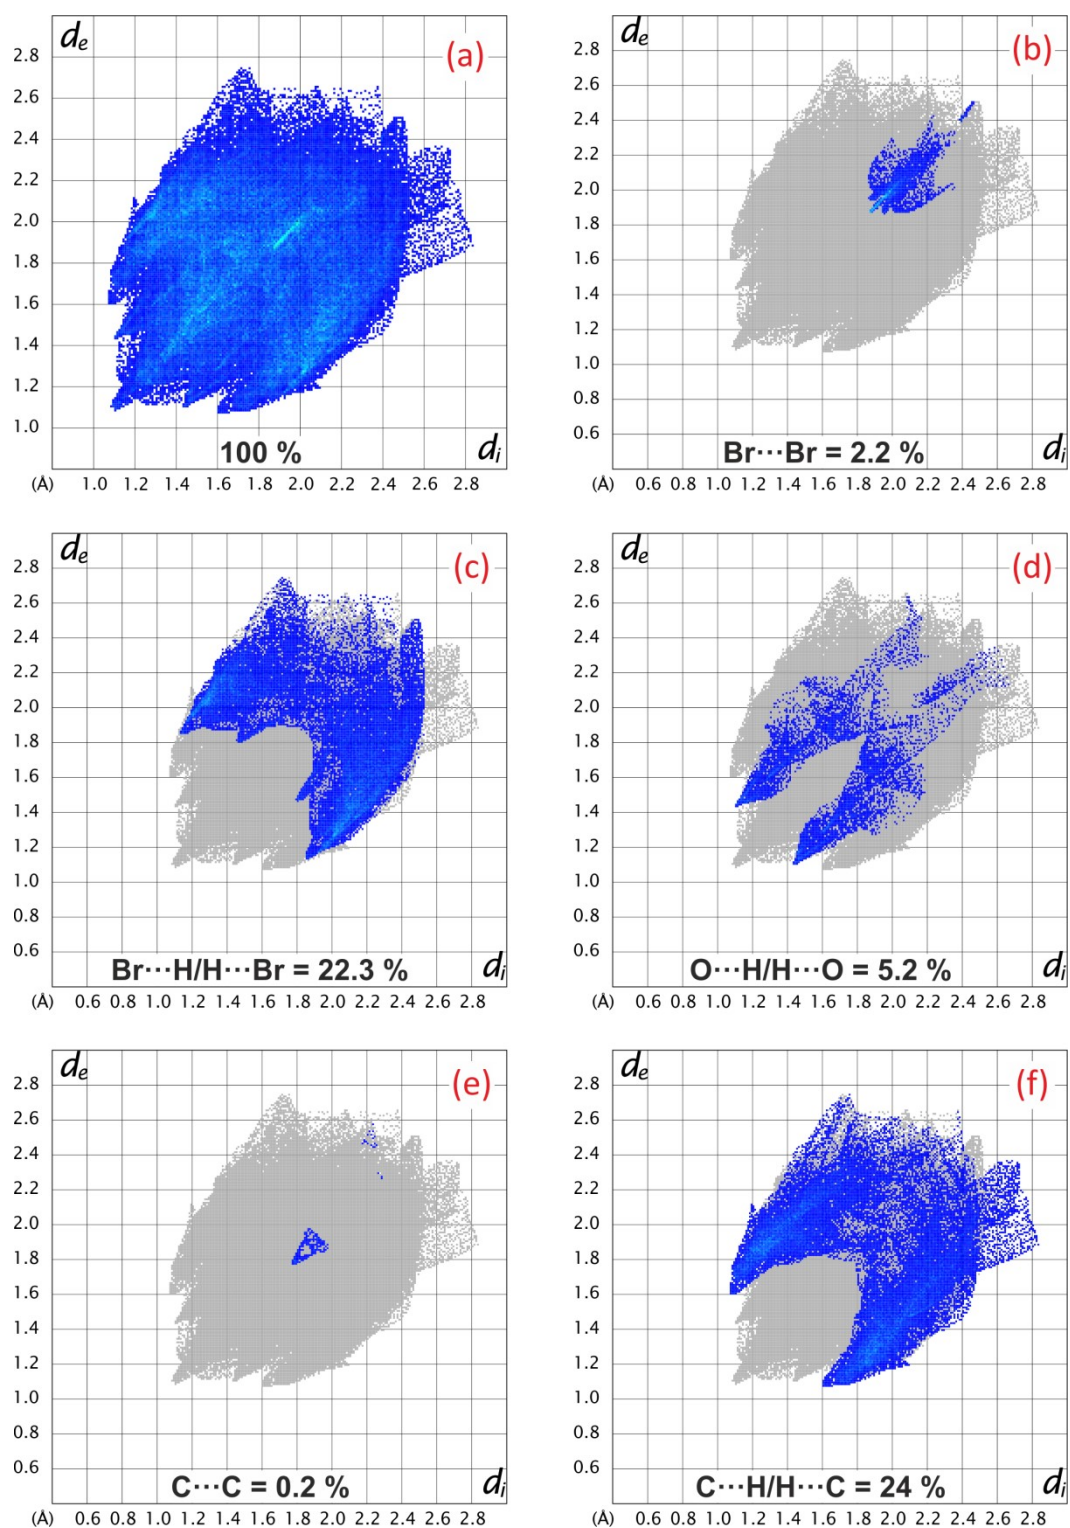

Figure S3 2D fingerprint plots for (a) overall interactions and (b-f) individual interactions in crystal packing of 1.

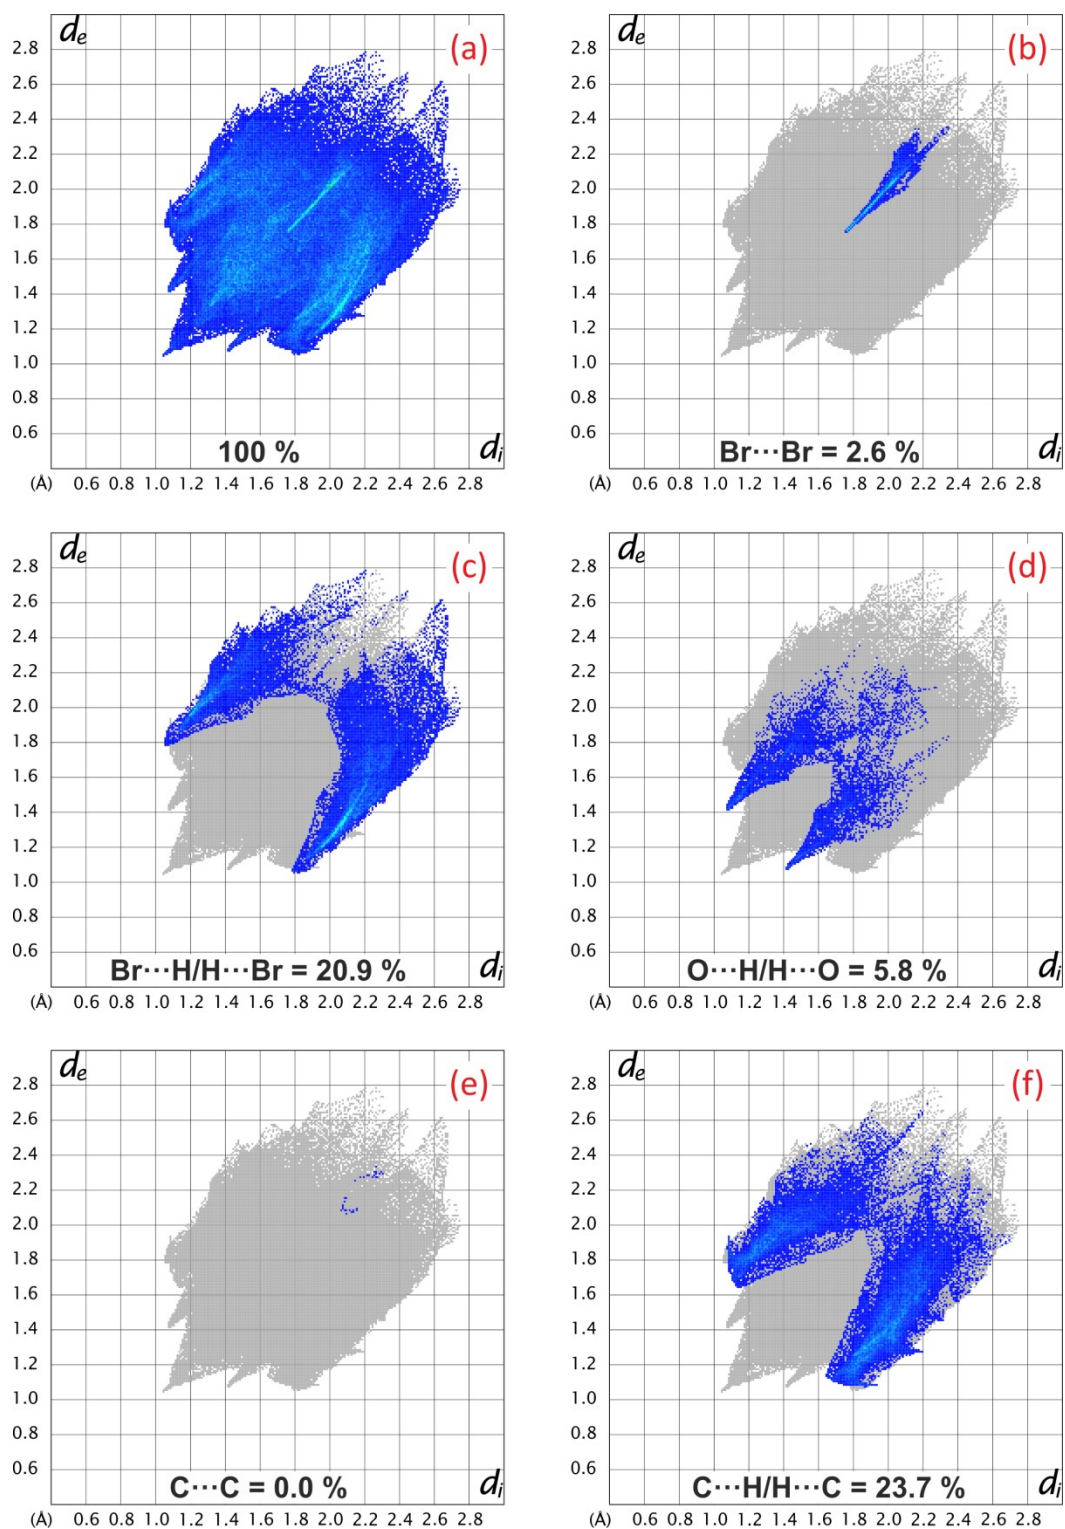

**Figure S4** 2D fingerprint plots for (a) overall interactions and (b-f) individual interactions in crystal packing of **2**.

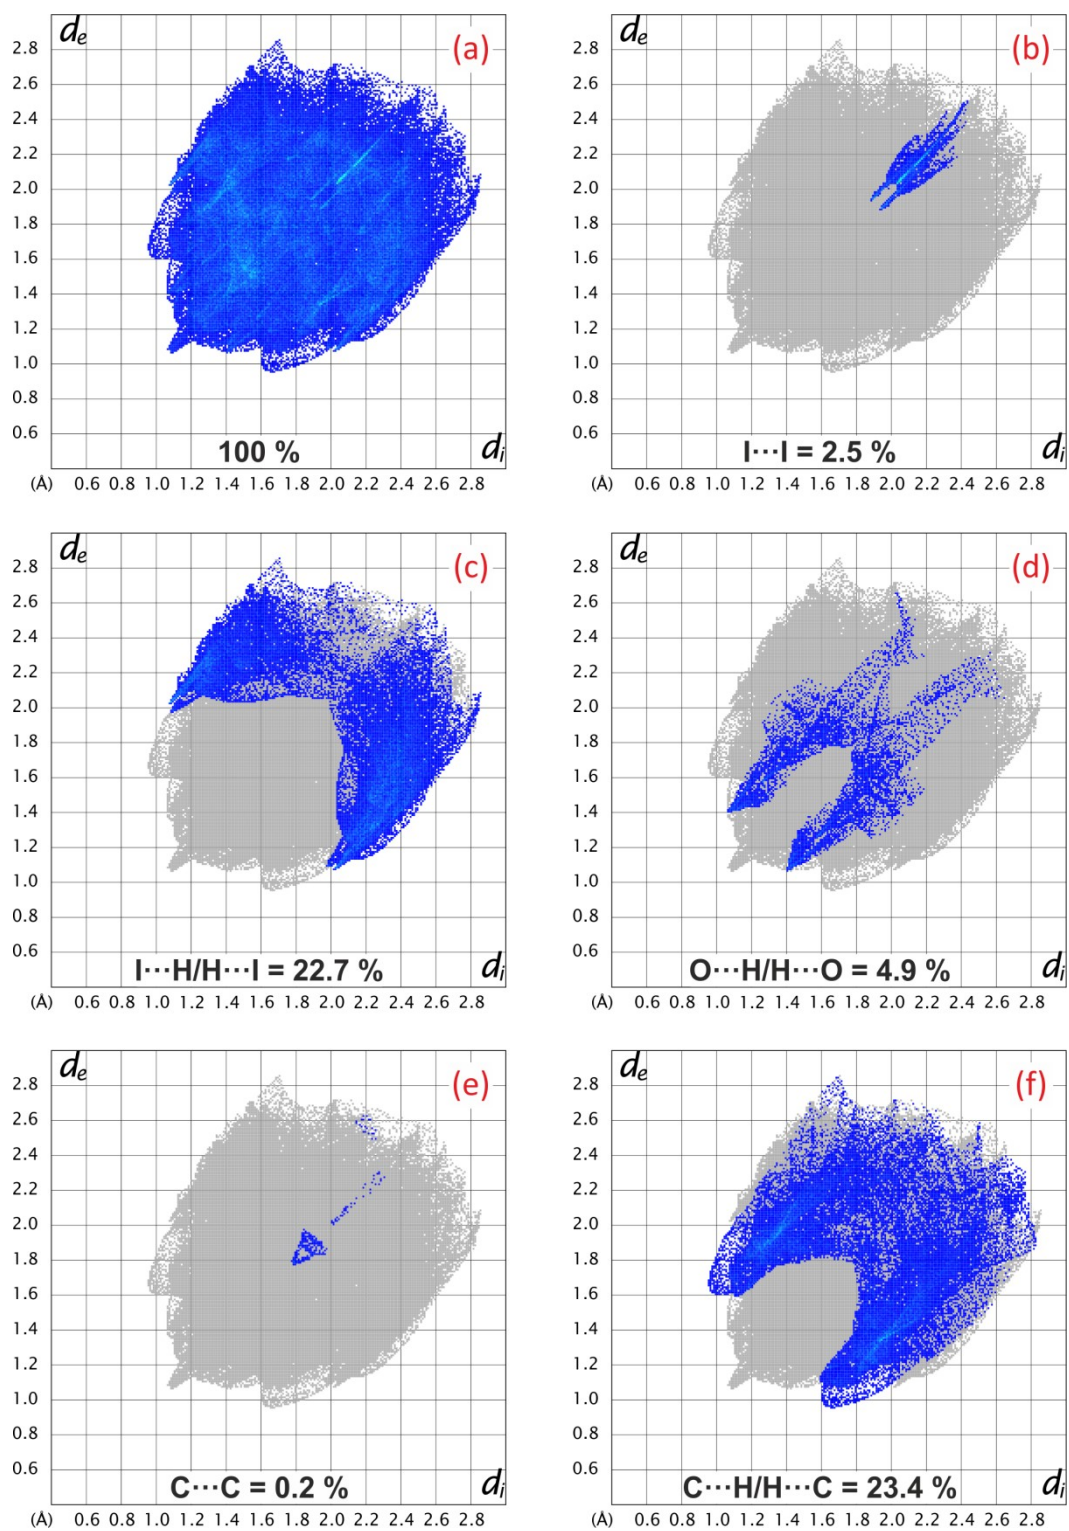

**Figure S5** 2D fingerprint plots for (a) overall interactions and (b-f) individual interactions in crystal packing of **3**.



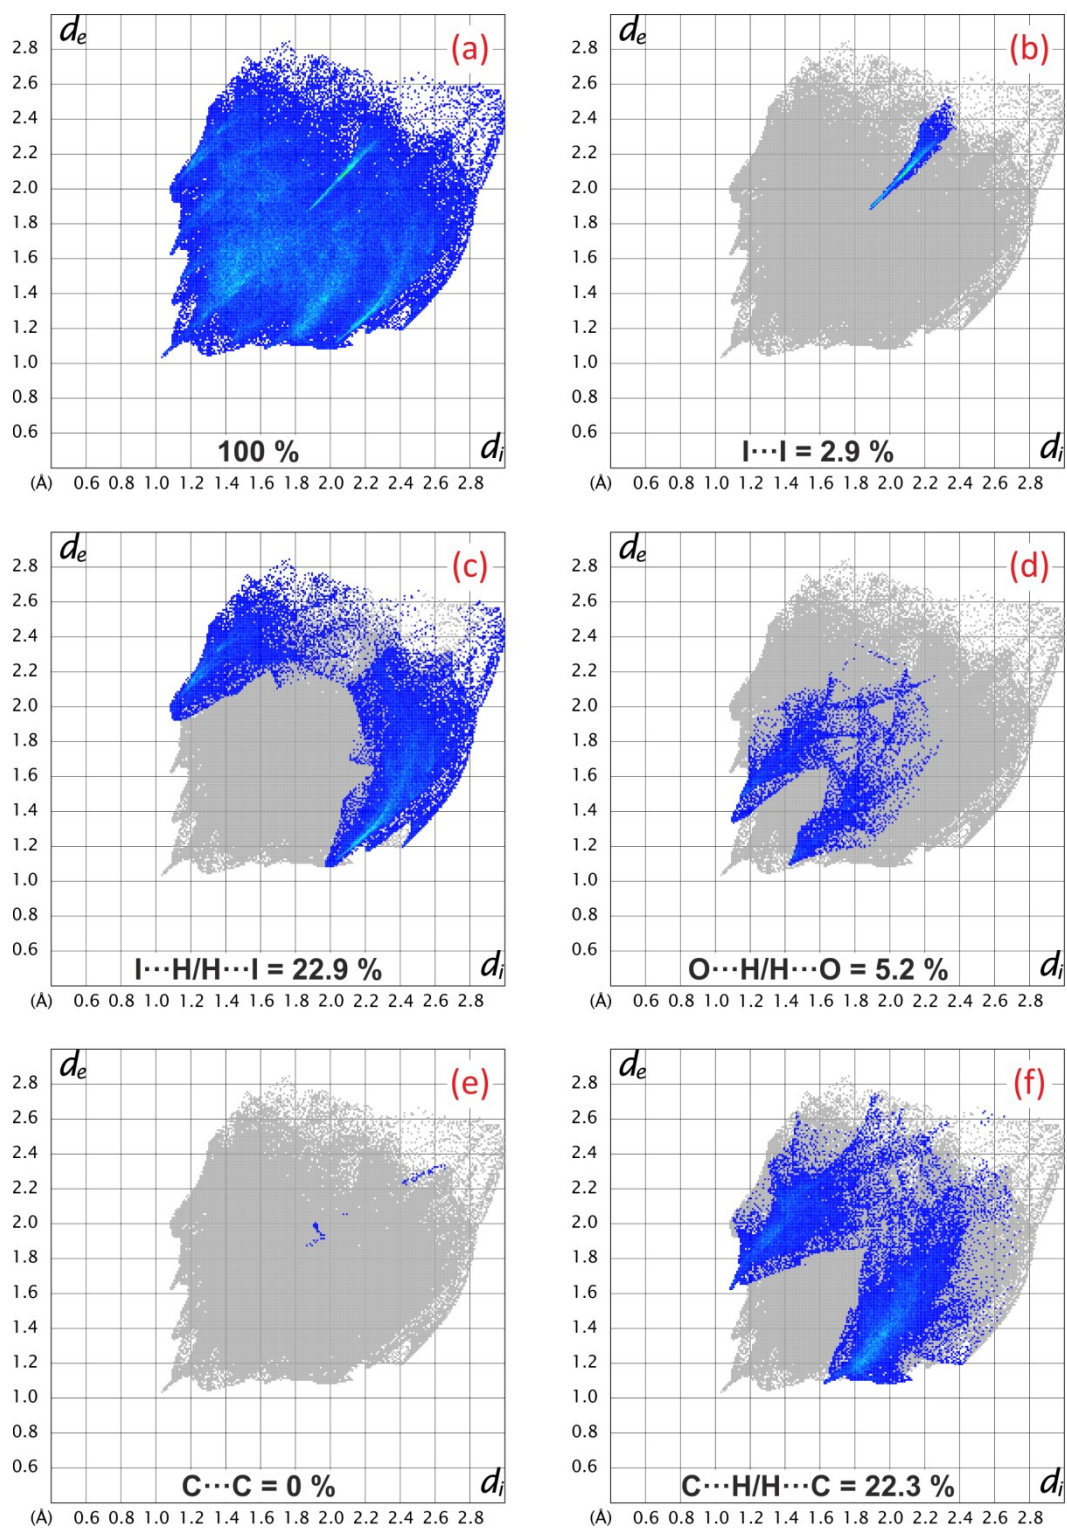

**Figure S6** 2D fingerprint plots for (a) overall interactions and (b-f) individual interactions in crystal packing of **4-1**.

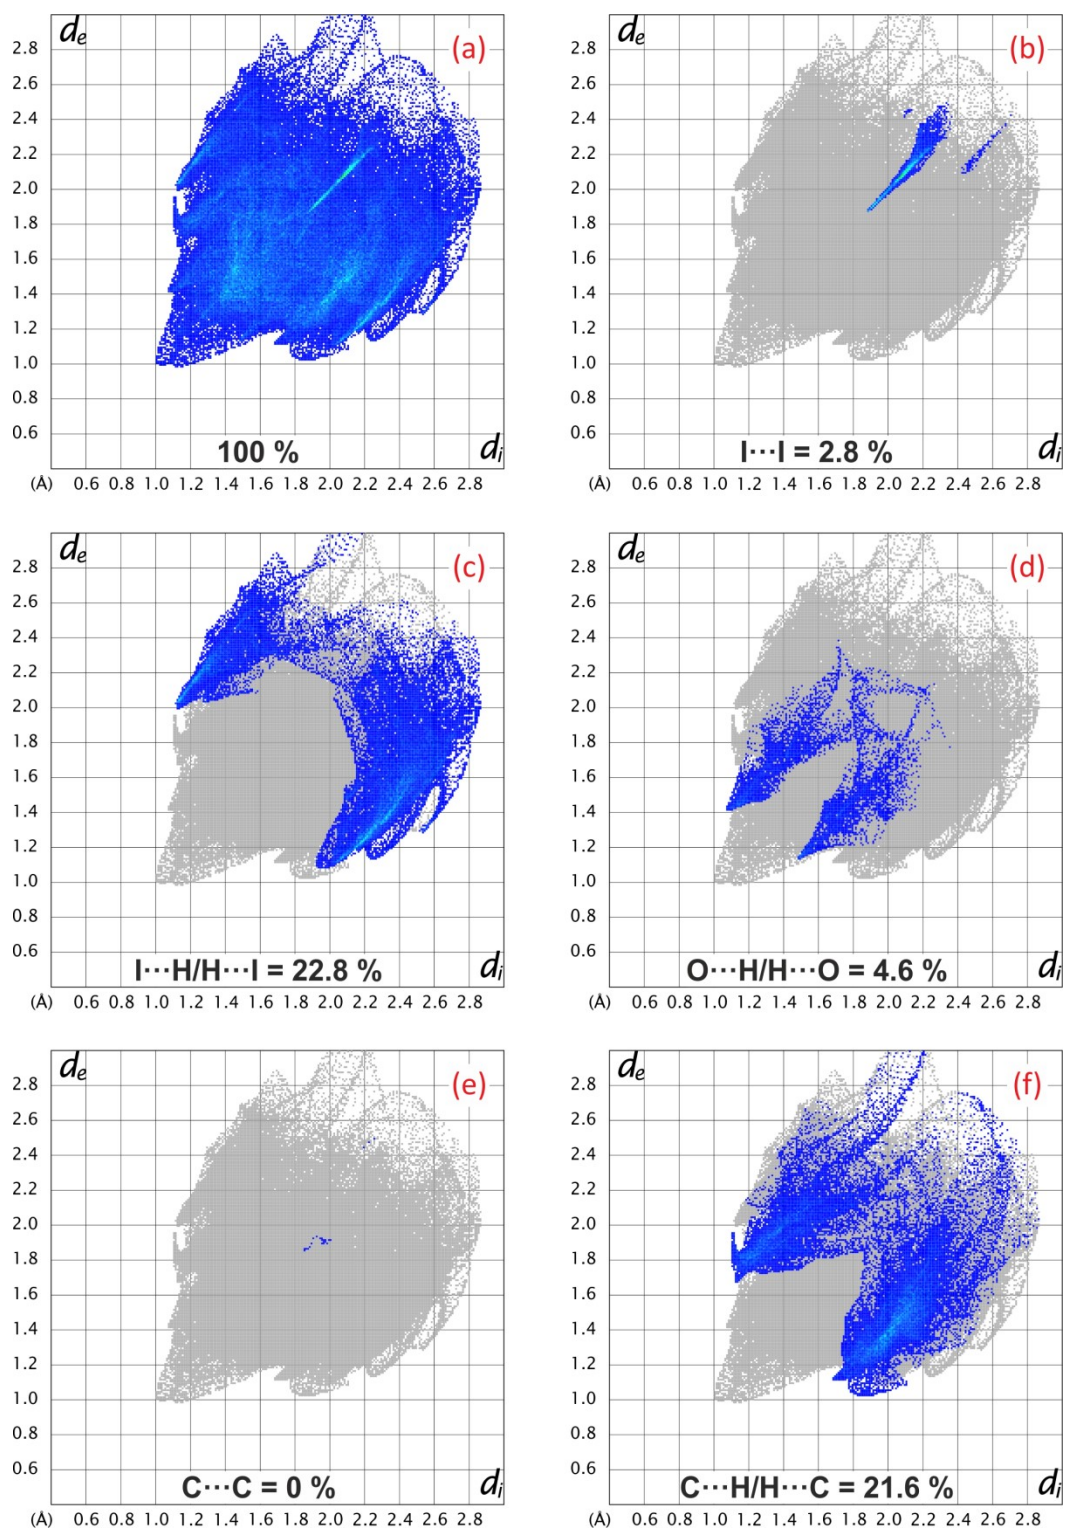

**Figure S7** 2D fingerprint plots for (a) overall interactions and (b-f) individual interactions in crystal packing of 4-2.

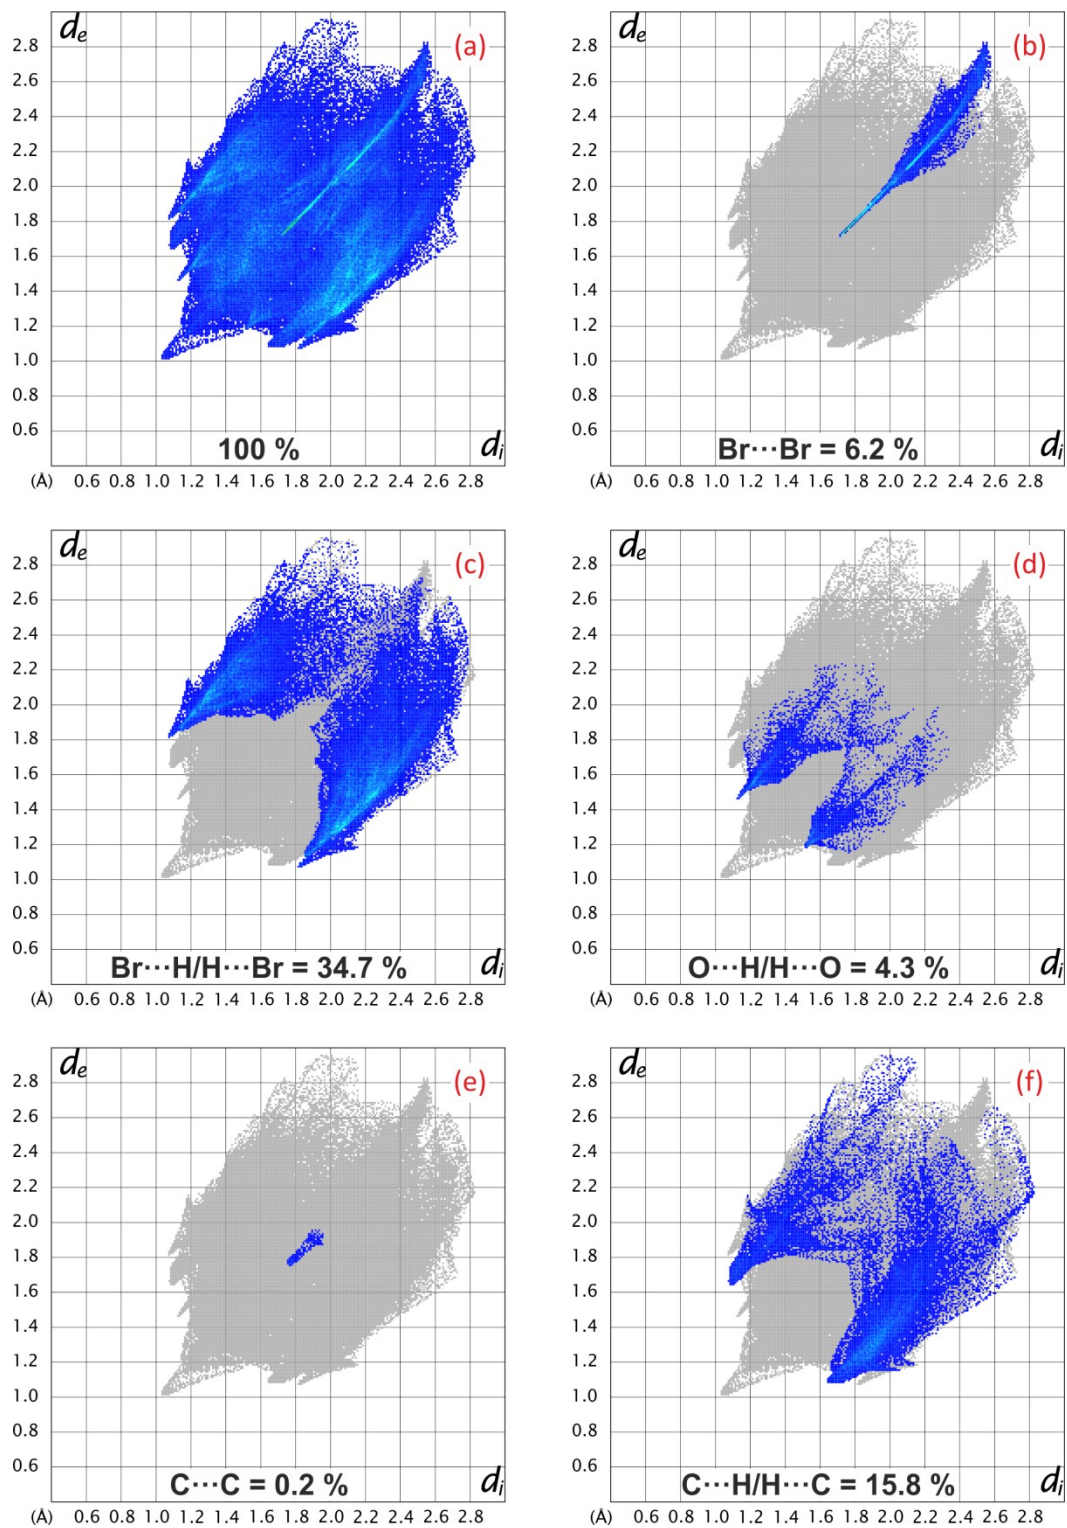

**Figure S8** 2D fingerprint plots for (a) overall interactions and (b-f) individual interactions in crystal packing of **5**.



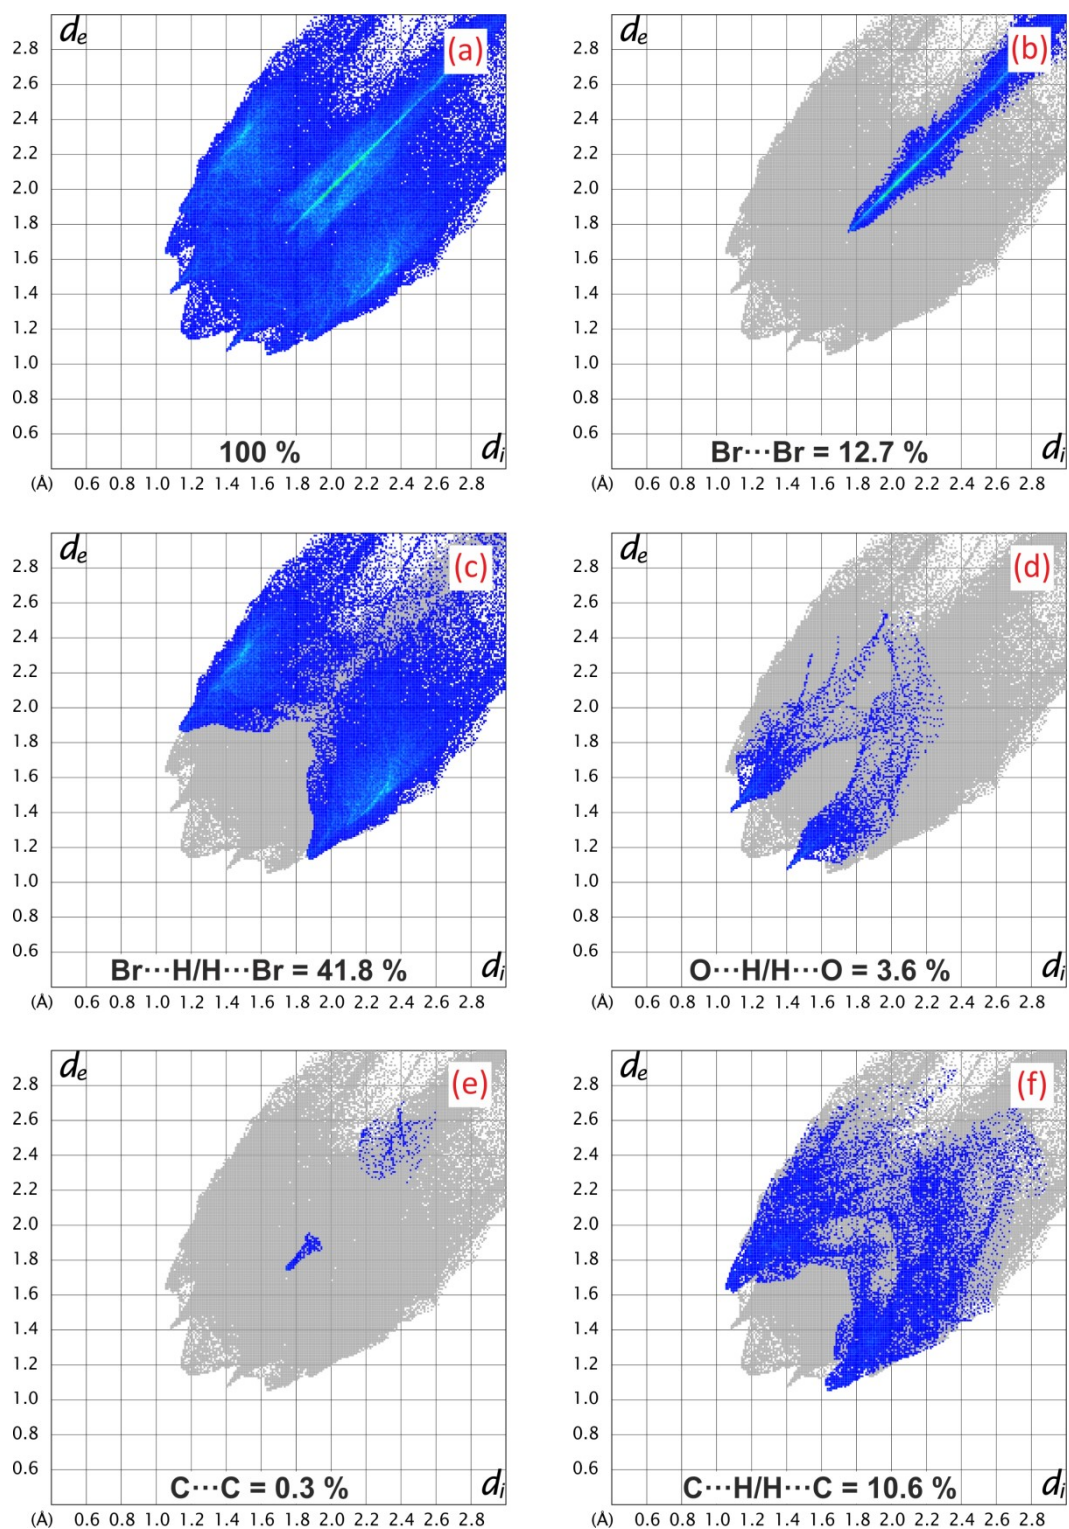

**Figure S9** 2D fingerprint plots for (a) overall interactions and (b-f) individual interactions in crystal packing of **6**.

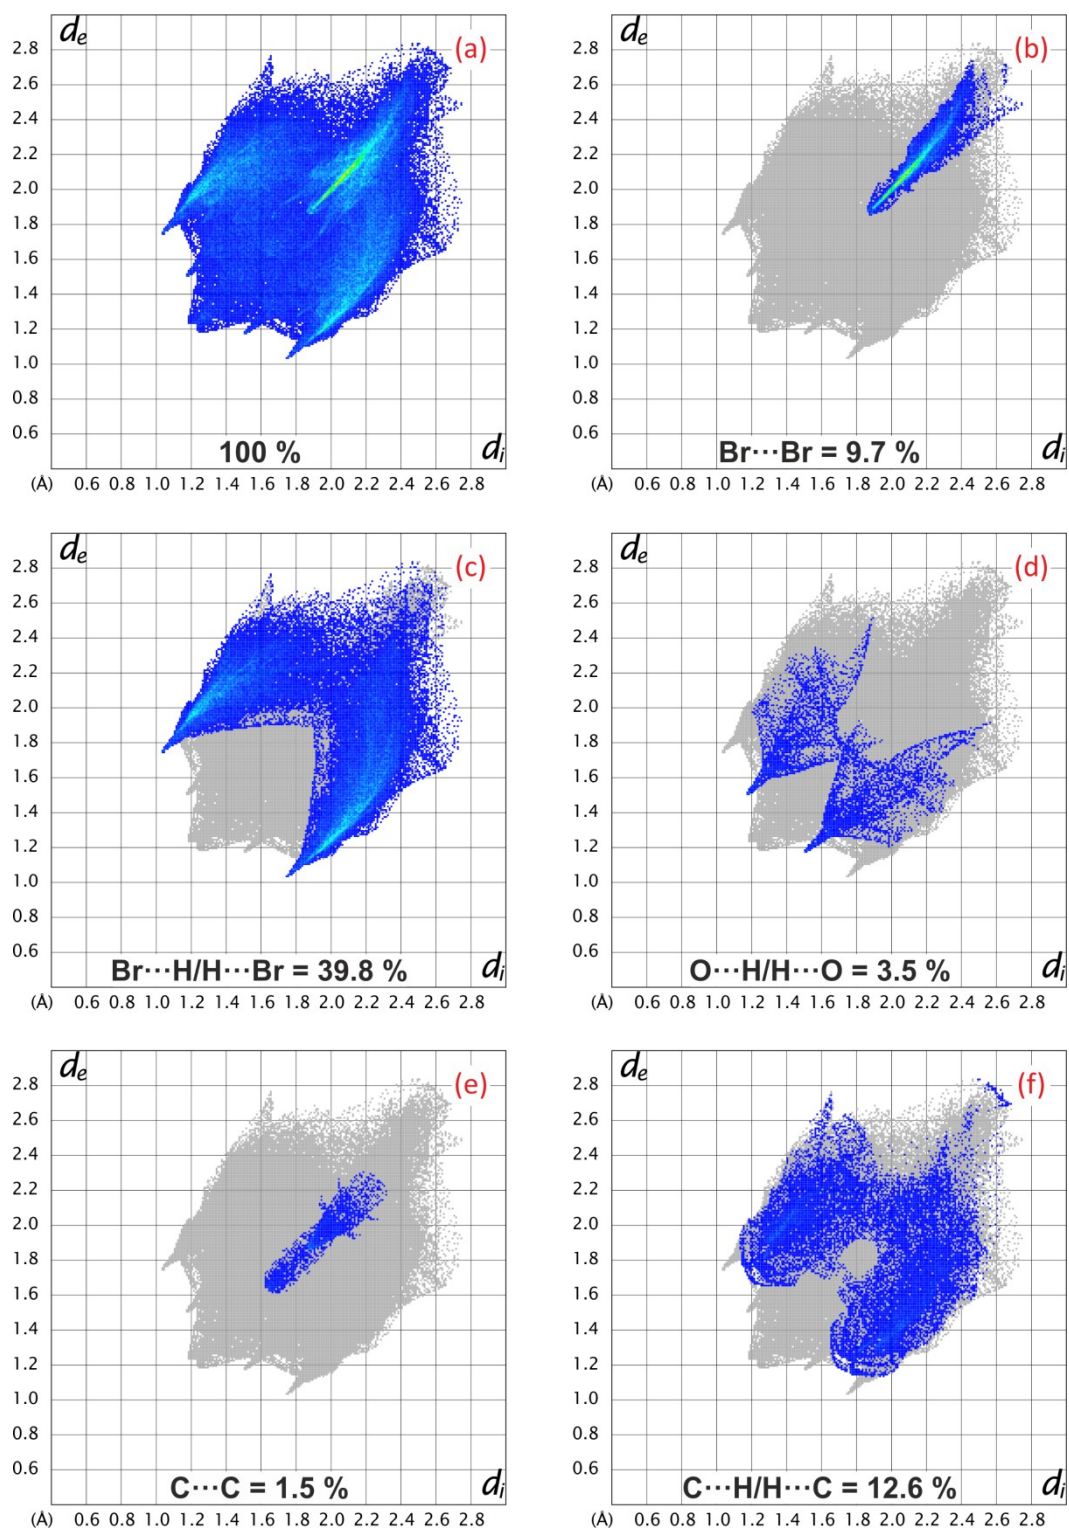

**Figure S10** 2D fingerprint plots for (a) overall interactions and (b-f) individual interactions in crystal packing of 7.



4.  $^1\text{H}$  and  $^{13}\text{C}$  NMR spectra of compounds 1 – 7 (Figures S11-S24)

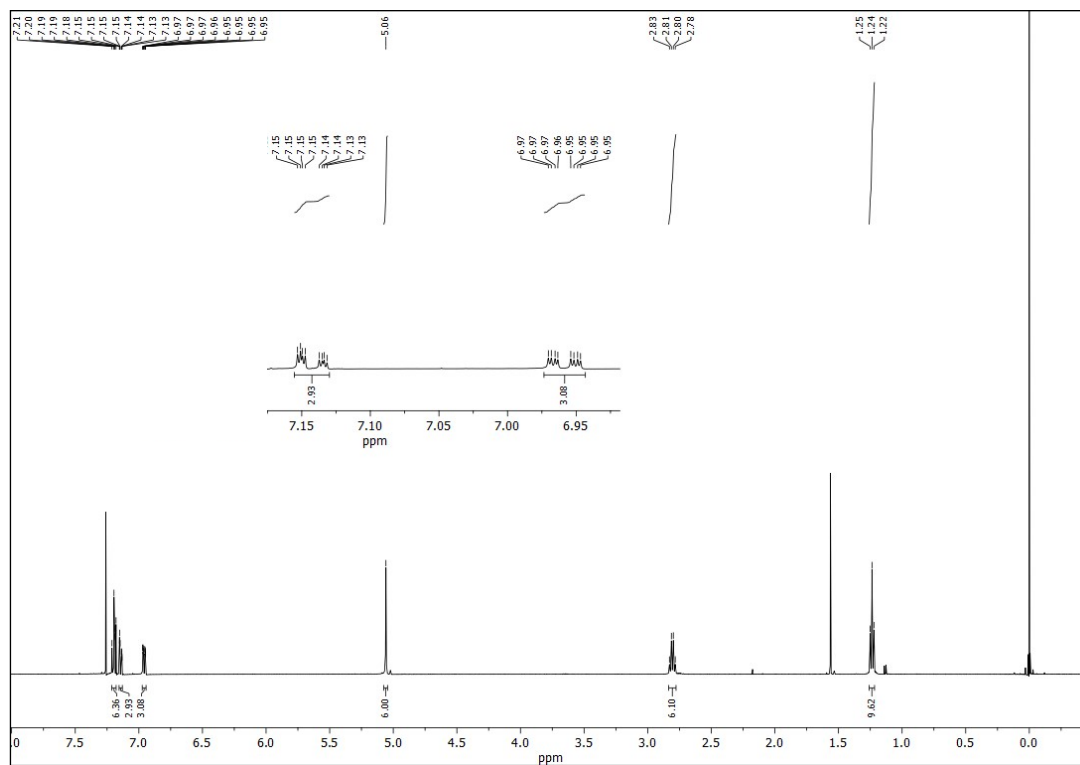

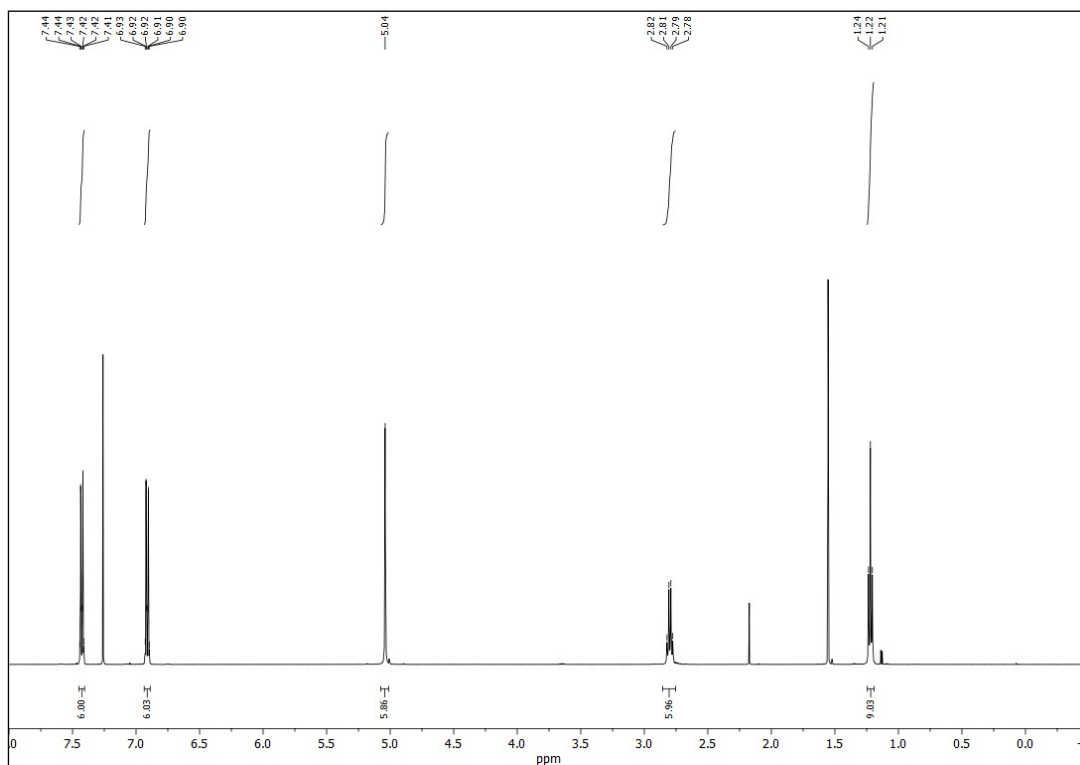

**Figure S13**  $^1\text{H}$  NMR spectrum of compound **2** in  $\text{CDCl}_3$ .

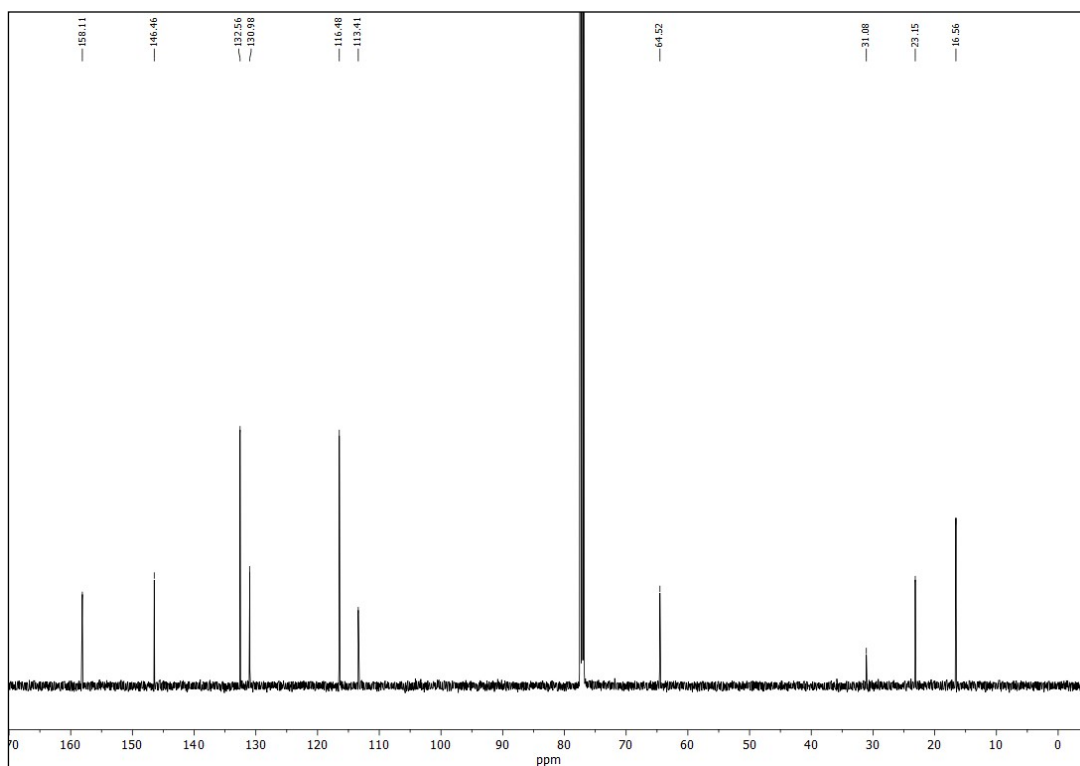

**Figure S14**  $^{13}\text{C}$  NMR spectrum of compound **2** in  $\text{CDCl}_3$ .

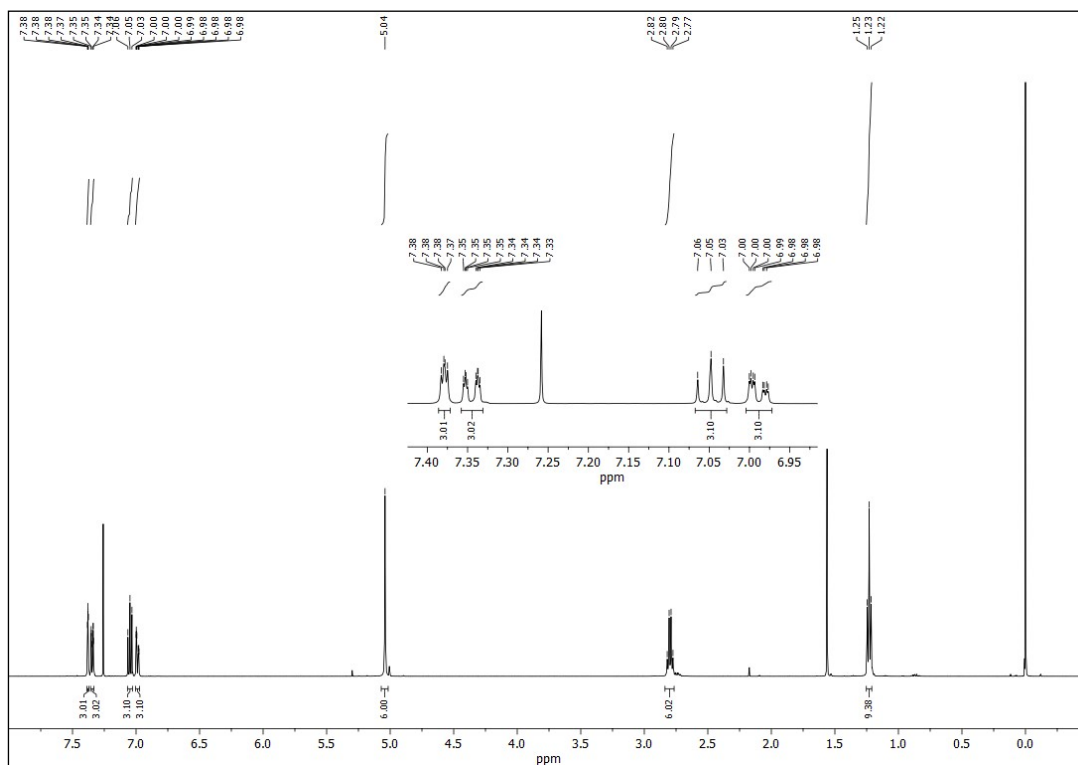

Figure S15  $^1\text{H}$  NMR spectrum of compound **3** in  $\text{CDCl}_3$ .

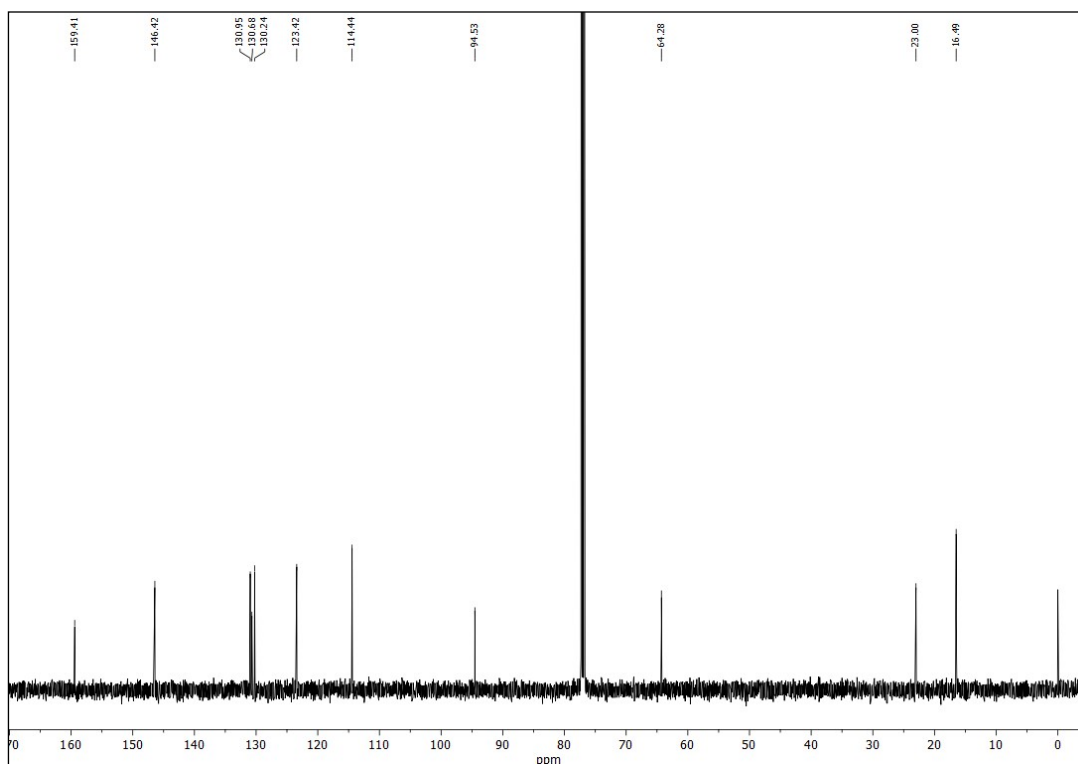

Figure S16  $^{13}\text{C}$  NMR spectrum of compound **3** in  $\text{CDCl}_3$ .

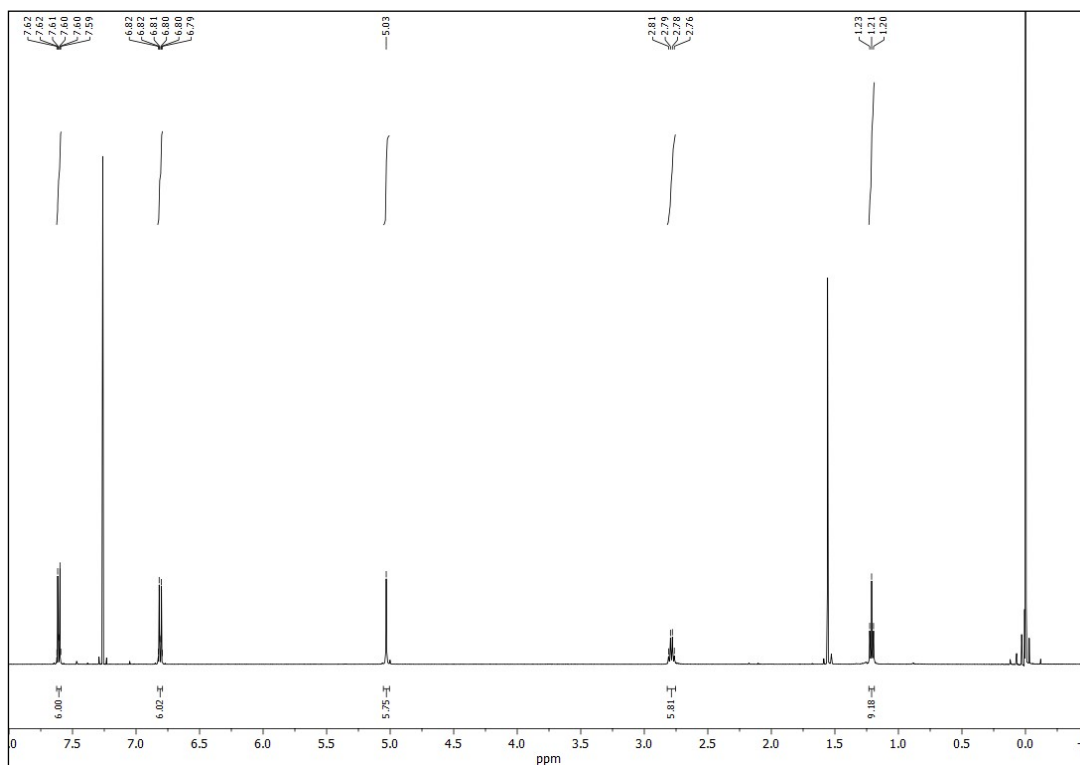

**Figure S17**  $^1\text{H}$  NMR spectrum of compound **4** in  $\text{CDCl}_3$ .

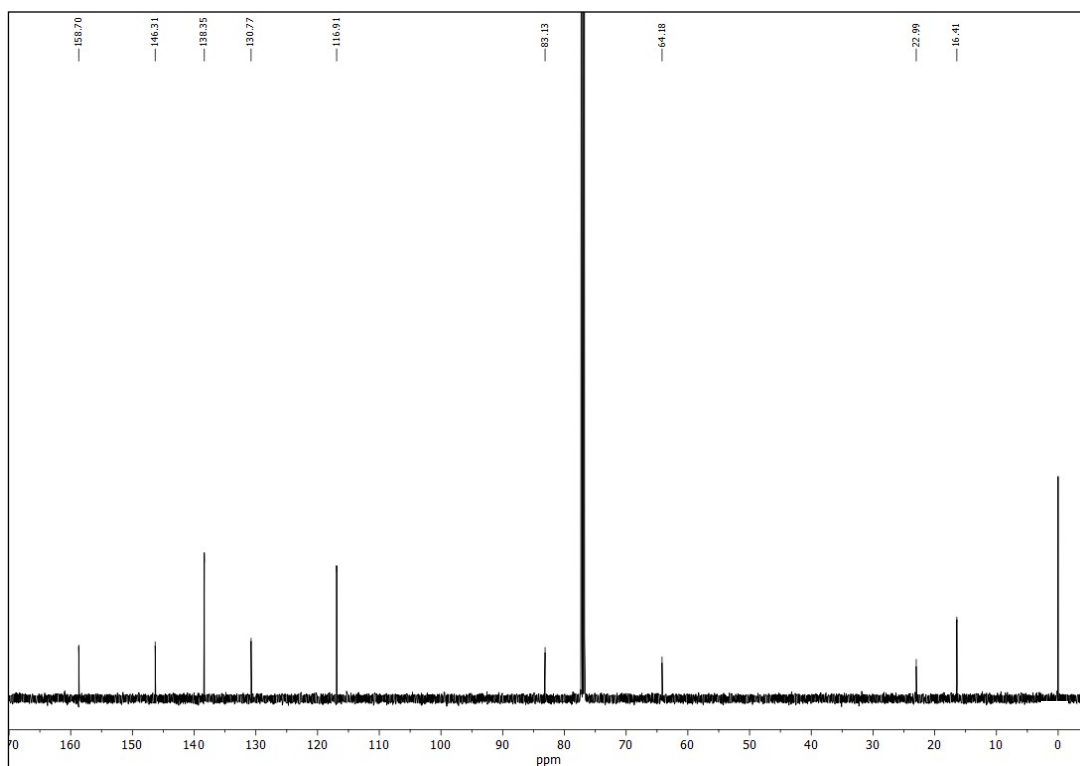

**Figure S18**  $^{13}\text{C}$  NMR spectrum of compound **4** in  $\text{CDCl}_3$ .

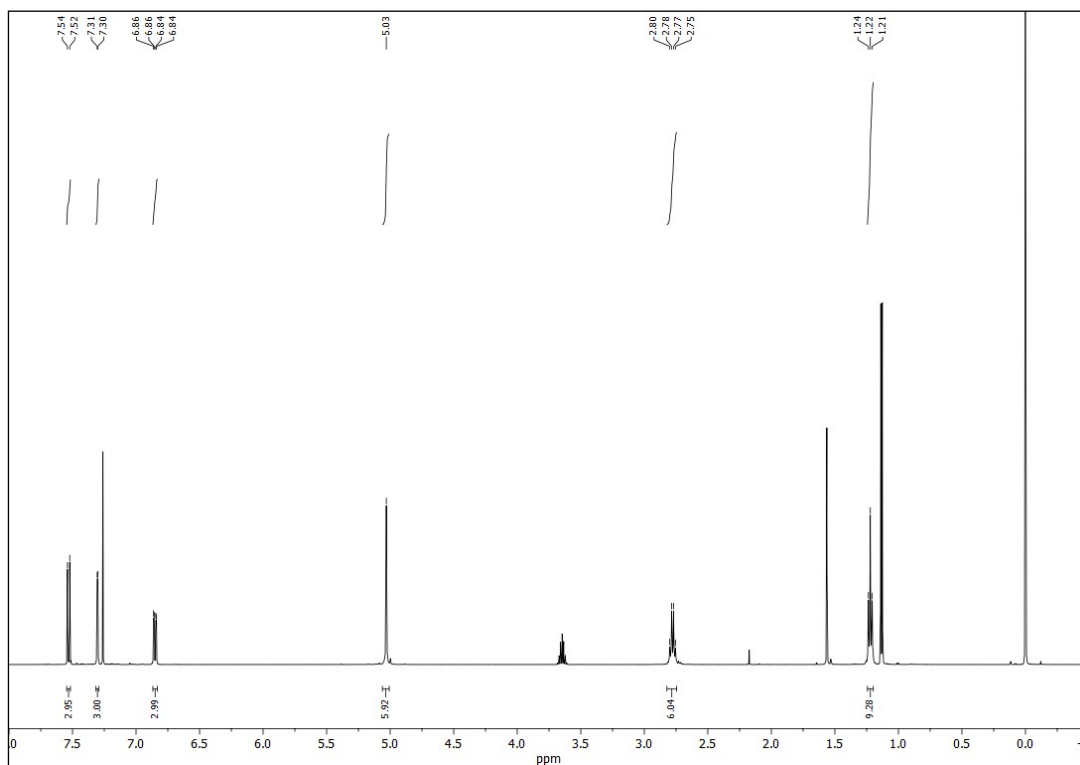

**Figure S19**  $^1\text{H}$  NMR spectrum of compound **5** in  $\text{CDCl}_3$ .

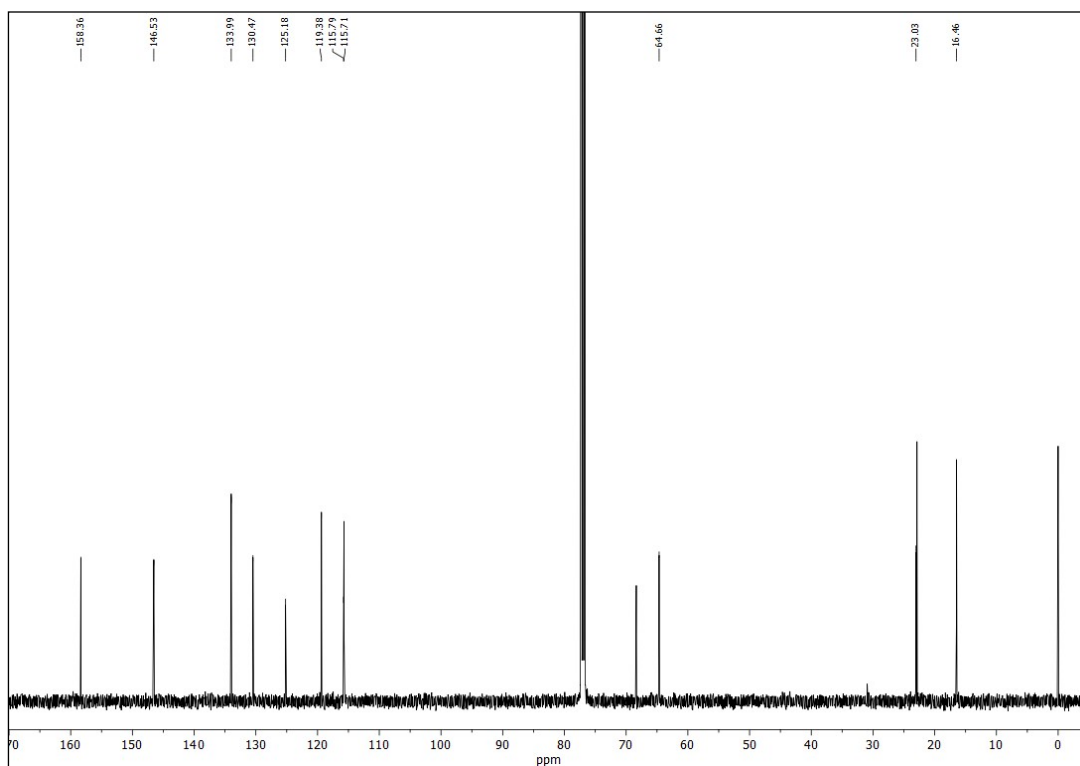

**Figure S20**  $^{13}\text{C}$  NMR spectrum of compound **5** in  $\text{CDCl}_3$ .

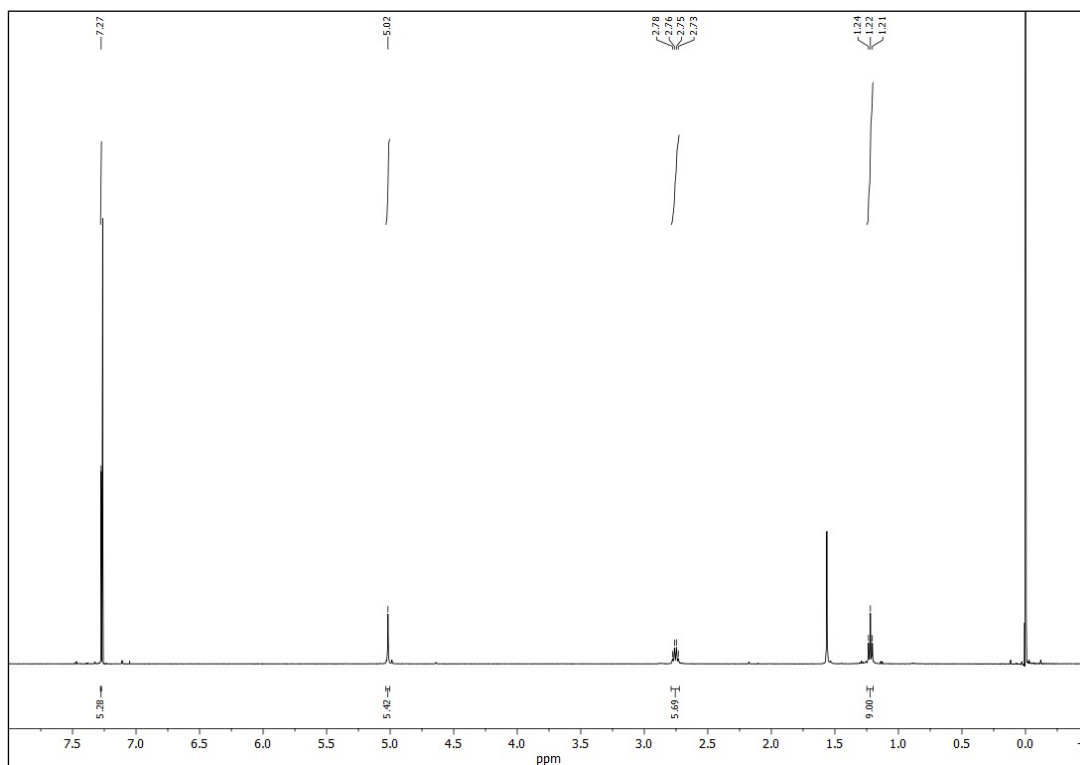

**Figure S21**  $^1\text{H}$  NMR spectrum of compound **6** in  $\text{CDCl}_3$ .

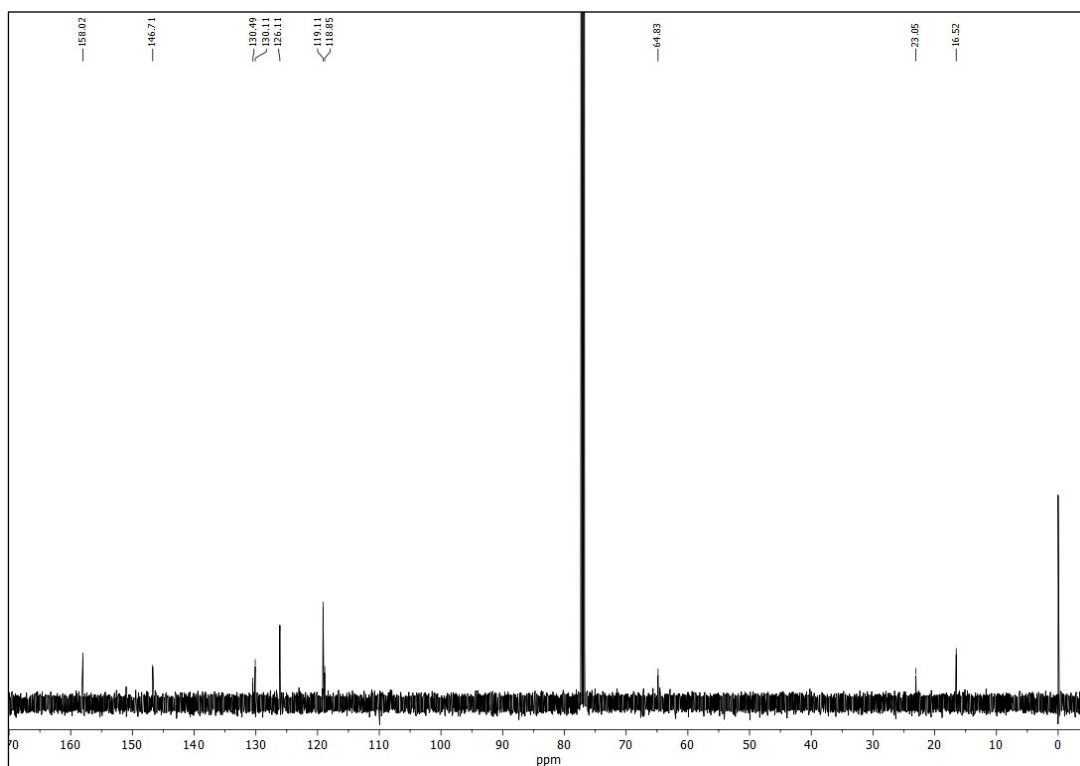

**Figure S22**  $^{13}\text{C}$  NMR spectrum of compound **6** in  $\text{CDCl}_3$ .

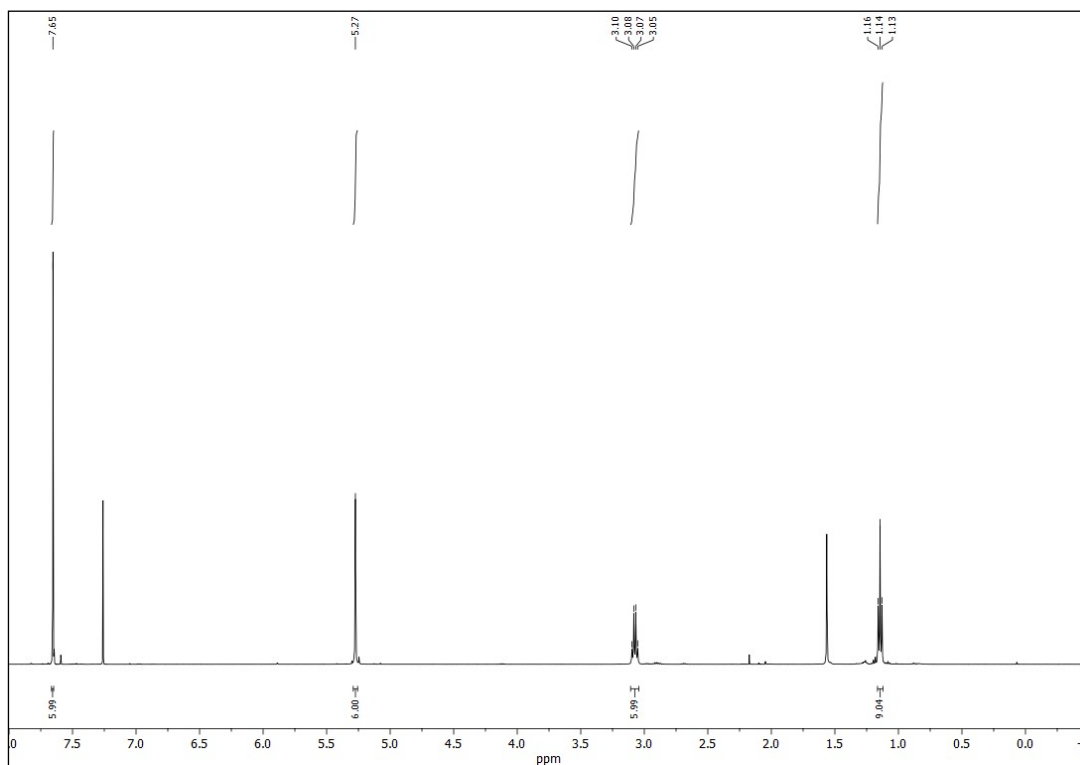

**Figure S23**  $^1\text{H}$  NMR spectrum of compound **7** in  $\text{CDCl}_3$ .

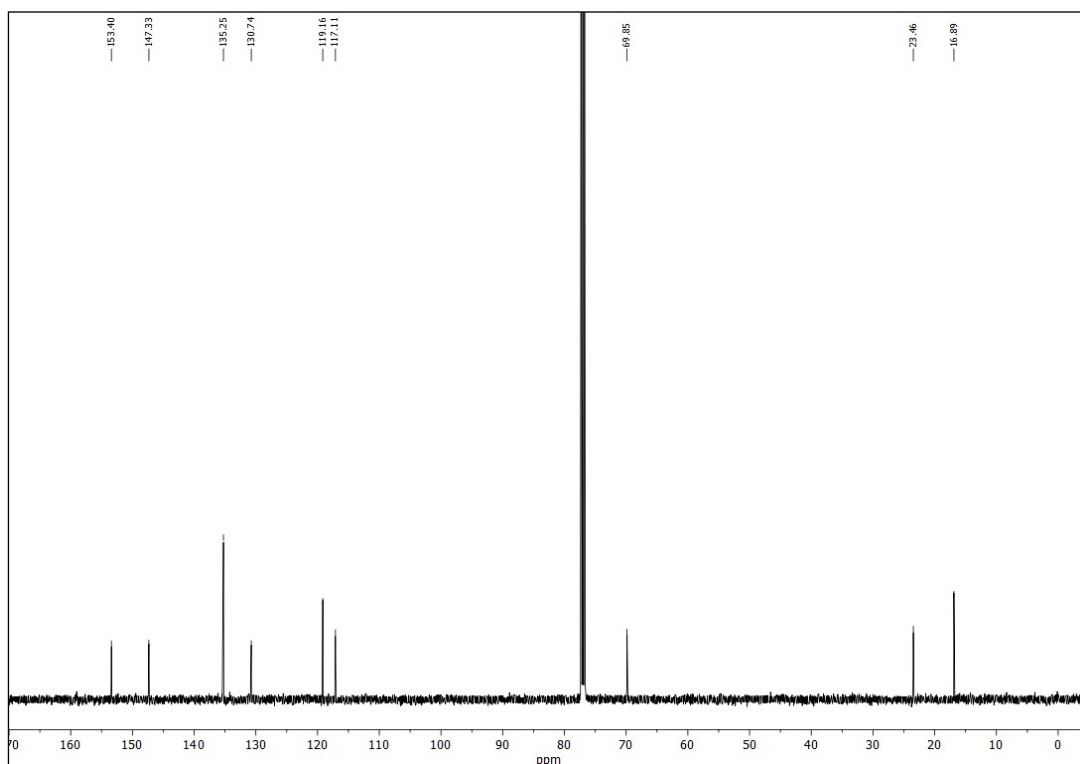

**Figure S24**  $^{13}\text{C}$  NMR spectrum of compound **7** in  $\text{CDCl}_3$ .
